# Supplementary material for: Designing an innovation system to support profitable electro- and bio-catalytic carbon upgrade
Source: Royal Society of Chemistry journal article supplement (doi:10.1039/d1ee03753f), 2022-01-01
Supplement: d1ee03753f1.xlsx [file d1ee03753f1.xlsx]

## Sheet: Summary Table
	Summary Table & User Input
	Calculations for the material, energy, and economic balance are provide below. All values are calculated based on user input from the Summary Table. A description of each calculation is provided before each subsection.
	User inputs are denoted by tables in:
	Summary table of key values denoted by tables in:
	Summary of key results denoted by tables in:
	User Inputs Instructions: Choose a scenario with preset values or specify the "User Specified" scenario and inout custom numbers. For sensitivity analysis of different variables, adjust the table in the "Process Variables Input" section. Finally, the user must use Goal-Seek to set bioth target functions to 0 in order to properly size the bioreactors.
	Scenario Input					Process Variables Input					Key Economic Results
	Scenarios from this Present Work					For Sensitivity Analysis					Full Process
	Scenario	Future Technology, Balanced				Economic Variables					Cost	Price	Units
						Variable	Input	Units			Total Equipment & Capital Costs	1062.07	$M USD
	OR					Production Capacity	102748	tonnes/year			Operating Expenses	569.295	$M USD/year
						Operating Days	350	days			Operating Credits	-592.383	$M USD/year
	User Specified Model Input					Plant Life	30	years			Total Operating Costs	-23.0883	$M USD/year
						Capital Salvage Value	0.2	of Capital Expenses
	Variable	Input	Units			Working Capital	0.05	of Capital Expenses			Net Present Value	-886.567	$M USD
	Electrocatalysis Methanol CCE	0.8	-			Income Tax Rate	0.257	-			NPV with HTL	-2171.77	$M USD
	Electrocatalysis Formate CCE	0.91	-			Nominal Interest Rate	0.1	-
	Electrocatalysis Methanol FE	0.776	-
	Electrocatalysis Formate FE	0.97	-			Operating Variables
	Electrocatalysis Current Density	0.5	A/cm^2			Variable	Input	Units			Electrocatalysis Subprocess
	Formate Catalyst Lifetime	200	h			Labour Wage	32	$/h
	Methanol Catalyst Lifetime	200	h			Dilution Rate/Growth Rate	0.2	h^-1			Cost	Price	Units
	Bioreactor Methanol to Biomass Yield	0.613	g/g			Catalyst Density	1	mg/cm^2			Total Equipment & Capital Costs	991.62	$M USD
	Bioreactor Formate to Biomass Yield	0.15	g/g			Liquid Separation Cost/Utility Usage	1	of Baseline Cost			Operating Expenses	584.578	$M USD/year
	Bioreactor Methanol to PHB Yield	0.54	g/g								Operating Credits	-620.86	$M USD/year
	Bioreactor Formate to PHB Yield	0.13	g/g			Feedstock Prices & Product Credits					Total Operating Costs	-36.2818	$M USD/year
	Methanol Stoichiometry	4	mol			Variable	Input	Units
	Formate Stoichiometry	20	mol			Carbon Dioxide Purchase	30	$/tonne			Net Present Value	-693.54	$M USD
	Max Substrate Concentration	0.043	wt frac.			Process Water Price	0.5	$/m^3
						Hydrogen Gas	Green Hydrogen	$/tonne
						Methanol Credit	388.25	$/tonne
						Sodium Formate Credit	369.3	$/tonne			Biocatalysis Subprocess
						Biomass Credit	0.5138	$/lb
						PHB Credit	4482	$/tonne			Cost	Price	Units
											Total Equipment & Capital Costs	591.177	$M USD
	Goal-Seek for Bioreactor Design					Carbon Price					Operating Expenses	743.735	$M USD/year
						Variable	Input	Units			Operating Credits	-592.383	$M USD/year
	Bioreactor	Target Function to Set to 0	Variable to Vary			By Jurisdiction	User Specified				Total Operating Costs	151.352	$M USD/year
	Growth	3.81106e-06	0.646058			OR User Specified	40	$/tonne of CO2
	Accumulation	5.45355e-06	0.484932			Carbon Price	40	$/tonne of CO2			Net Present Value	-2039.05	$M USD
						Utilities
						Variable	Input	Units
						Electricity by Reference	User Specified	$/kWh
						OR User Specified	0.03	$/kWh
						Steam by Source	Electricity	$/kg			Key Emissions Results
						Electricity Price	0.03	$/kWh			Description	Emissions	Units
						Cooling Water Price	0.057	$/m^3			Net Emissions (DAC CO2)	1.00748	tCO2/tPHB
						Steam Price	0.0217187	$/kg			Net Emissions (Point source CO2)	4.84915	tCO2/tPHB
	A summary of the key calculations and economics are presented below, based on the user input given above. Do not adjust these values.
	Key Operating Variables for Chosen Scenario					Key Design Features
	Variable	Input	Units			Variable	Input	Units
	Electrocatalysis Methanol CCE	0.8	-			Overall Biomass Yield	0.207694	g biomass/g substrate
	Electrocatalysis Formate CCE	0.91	-			Overall PHB Yield	0.18109	g PHB/g substrate
	Electrocatalysis Methanol FE	0.776	-			Growth Reactor Heat Generated	51.7748	MW
	Electrocatalysis Formate FE	0.97	-			Accumulation Reactor Heat Generated	147.553	MW
	Electrocatalysis Current Density	0.5	A/cm^2			Growth Reactor Volume	10202.1	m^3
	Formate Catalyst Lifetime	200	h			Growth Reactor Height	32.2051	m^3
	Methanol Catalyst Lifetime	200	h			Growth Reactor Diameter	5.36751	m^3
	Bioreactor Methanol to Biomass Yield	0.613	g/g			Accumulation Reactor Volume	15673.4	m
	Bioreactor Formate to Biomass Yield	0.15	g/g			Accumulation Reactor Height	32.995	m
	Bioreactor Methanol to PHB Yield	0.54	g/g			Accumulation Reactor Diameter	5.49917	m
	Bioreactor Formate to PHB Yield	0.13	g/g			Methanol Electrolyzer Power Required	257717	kW
	Methanol Stoichiometry	4	mol			Methanol Electrolyzer Area	20617.4	m^2
	Formate Stoichiometry	20	mol			Methanol Catalyst Requirement Per Year	8659.3	kg
	Methanol Concentration	0.0060603	wt frac.			Methanol Electrolyzer Cost	5223.35	$/m^2
	Formate Concentration	0.0425715	wt frac.			Formate Electrolyzer Power Required	343623	kW
						Formate Electrolyzer Area	27489.8	m^2
						Formate Catalyst Requirement Per Year	11545.7	kg
						Formate Electrolyzer Cost	2391.35	$/m^2
	Overall Stoichiometric Carbon Balance
	Species		Input	Generated	Consumed	Recycled	Losses	Output
	Carbon Dioxide		1295.9	1917.65	2984.75	2059.2	228.801	0
	Methanol		0	497.458	497.458	1750.99	0	0
	Sodium Formate		0	2487.29	2487.29	0	0	0
	Biomass		0	134.106	0	0	2.66872	131.438
	PHB		0	143.733	0	0	2.26	141.473
	Scaling Variables
	Base Production Capacity	102748	tonnes/year
	Base Operating Days	350	days/year

## Sheet: Carbon Flow
	Carbon Flow through Process
	The flow of the process carbon is shown in the table below as it passes through major subprocces. The carbon flow is provided for: the full process, the electrocatalysis subprocess, and the bioconversion subprocess. All quantities are molar to allow for easy comparison and calculation of conversions.
	Note: Numbers are slighly off of values from ASPEN Plus model since values are scaled based on conversions.
	Future Technology, Balanced
	All units in kmol/h
	Inlet and outlet streams are denoted by columns in:
	Full Process
		Makeup CO2 In	CO2 Feed	Methanol Electrocatalysis In	Methanol Electrocatalysis Out	Methanol Liquid Separation In	Methanol Liquid Separation to Bioconversion	Methanol Liquid Separation Recycle	Formate Electrocatalysis In	Formate Electrocatalysis Out	Formate Liquid Separation In	Formate Liquid Separation to Bioconversion	Formate Liquid Separation Recycle	To Bioreactors	Growth Reactor In	Growth Reactor Liquid Out	Growth Reactor Gas Out	Accumulation Reactor In	Accumulation Reactor Liquid Out	Accumlation Reactor Gas Out	Gas Separation In	Gas Separation Recycle	Gas Separation Loss	Product Extraction In	Product Extraction Loss	Biomass Out	PHB Out
	Carbon Dioxide	1295.9	3355.11	621.823	124.365	0	0	0	2733.29	245.996	0	0	0	0	0	0	898.081	0	0	1019.56	2288.01	2059.2	228.801	0	0	0	0
	Methanol	0	0	1750.99	2248.45	2248.45	497.458	1750.99	0	0	0	0	0	497.458	231.709	0	0	265.749	0	0	0	0	0	0	0	0	0
	Sodium Formate	0	0	0	0	0	0	0	0	2487.29	2487.29	2487.29	0	2487.29	1158.54	0	0	1328.75	0	0	0	0	0	0	0	0	0
	Biomass	0	0	0	0	0	0	0	0	0	0	0	0	0	0	134.106	0	134.106	134.106	0	0	0	0	134.106	2.66872	130.868	0.569952
	PHB	0	0	0	0	0	0	0	0	0	0	0	0	0	0	0	0	0	143.733	0	0	0	0	143.733	2.26	0.819998	140.653
	Electrocatalysis Process
		Makeup CO2 In	CO2 Feed	Methanol Electrocatalysis In	Methanol Electrocatalysis Out	Methanol Liquid Separation In	Methanol Liquid Separation Product	Methanol Liquid Separation Recycle	Formate Electrocatalysis In	Formate Electrocatalysis Out	Formate Liquid Separation In	Formate Liquid Separation Product	Formate Liquid Separation Recycle	Gas Separation In	Gas Separation Recycle	Gas Separation Loss	Methanol Out	Formate Out
	Carbon Dioxide	3021.78	3355.11	621.823	124.365	0	0	0	2733.29	245.996	0	0	0	370.36	333.324	37.036	0	0
	Methanol	0	0	1333.88	1831.33	1831.33	497.458	1333.88	0	0	0	0	0	0	0	0	497.458	0
	Sodium Formate	0	0	0	0	0	0	0	0	2487.29	2487.29	2487.29	0	0	0	0	0	2487.29
	Biomass	0	0	0	0	0	0	0	0	0	0	0	0	0	0	0	0	0
	PHB	0	0	0	0	0	0	0	0	0	0	0	0	0	0	0	0	0
	Bicatalysis Process
		Substrate to Bioreactors	Growth Reactor In	Growth Reactor Liquid Out	Growth Reactor Gas Out	Accumulation Reactor In	Accumulation Reactor Liquid Out	Accumlation Reactor Gas Out	Product Extraction In	Gas Losses	Product Extraction Loss	Biomass Out	PHB Out
	Carbon Dioxide	0	0	0	898.081	0	0	1019.56	0	1917.65	0	0	0
	Methanol	497.458	231.709	0	0	265.749	0	0	0	0	0	0	0
	Sodium Formate	2487.29	1158.54	0	0	1328.75	0	0	0	0	0	0	0
	Biomass	0	0	134.106	0	134.106	134.106	0	134.106	0	2.66872	130.868	0.569952
	PHB	0	0	0	0	0	143.733	0	143.733	0	2.26	0.819998	140.653
	Note: The table below is for reference, do not modify.
	Reference Full Process Carbon Balances for User Defined Models
		Makeup CO2 In	CO2 Feed	Methanol Electrocatalysis In	Methanol Electrocatalysis Out	Methanol Liquid Separation In	Methanol Liquid Separation to Bioconversion	Methanol Liquid Separation Recycle	Formate Electrocatalysis In	Formate Electrocatalysis Out	Formate Liquid Separation In	Formate Liquid Separation to Bioconversion	Formate Liquid Separation Recycle	To Bioreactors	Growth Reactor In	Growth Reactor Liquid Out	Growth Reactor Gas Out	Accumulation Reactor In	Accumulation Reactor Liquid Out	Accumlation Reactor Gas Out	Gas Separation In	Gas Separation Recycle	Gas Separation Loss	Product Extraction In	Product Extraction Loss	Biomass Out	PHB Out
	Carbon Dioxide	1295.9	3355.11	621.82	124.36	0	0	0	2733.29	246	0	0	0	0	0	0	898.08	0	0	1019.56	2288.01	2059.2	228.8	0	0	0	0
	Methanol	0	0	1750.99	2248.45	2248.45	497.46	1750.99	0	0	0	0	0	497.46	231.71	0	0	265.75	0	0	0	0	0	0	0	0	0
	Sodium Formate	0	0	0	0	0	0	0	0	2487.29	2487.29	2487.29	0	2487.29	1158.54	0	0	1328.75	0	0	0	0	0	0	0	0	0
	Biomass	0	0	0	0	0	0	0	0	0	0	0	0	0	0	134.11	0	134.11	134.11	0	0	0	0	134.11	2.67	130.87	0.57
	PHB	0	0	0	0	0	0	0	0	0	0	0	0	0	0	0	0	0	143.73	0	0	0	0	143.73	2.26	0.82	140.65
	Reference Electrocatalysis Process Carbon Balances for User Defined Models
		Makeup CO2 In	CO2 Feed	Methanol Electrocatalysis In	Methanol Electrocatalysis Out	Methanol Liquid Separation In	Methanol Liquid Separation Product	Methanol Liquid Separation Recycle	Formate Electrocatalysis In	Formate Electrocatalysis Out	Formate Liquid Separation In	Formate Liquid Separation Product	Formate Liquid Separation Recycle	Gas Separation In	Gas Separation Recycle	Gas Separation Loss	Methanol Out	Formate Out
	Carbon Dioxide	3021.78	3355.11	621.823	124.365	0	0	0	2733.29	245.996	0	0	0	370.36	333.324	37.036	0	0
	Methanol	0	0	1333.88	1831.33	1831.33	497.458	1333.88	0	0	0	0	0	0	0	0	497.458	0
	Sodium Formate	0	0	0	0	0	0	0	0	2487.29	2487.29	2487.29	0	0	0	0	0	2487.29
	Biomass	0	0	0	0	0	0	0	0	0	0	0	0	0	0	0	0	0
	PHB	0	0	0	0	0	0	0	0	0	0	0	0	0	0	0	0	0

## Sheet: Economics
	Economics & Net Present Value Calculations
	Costs for individual equipment units and operating processes are provided, along with all factors and scaling that went into determining the final NPV calculation. NPV was calculated for: the full process, the electrocatalysis subprocess, the bioconversion subprocess, and the full process with an additional hydrothermal liquefaction subprocess.
	Note: All capacity upper limits for the equipment and capital costs are user specified and can be changed as needed.
	Future Technology, Balanced
	Individual units and costs are denoted by columns in:
	Overall expenses are denoted by cells in:
	Full Process																						Electrocatalysis Subprocess																						Biocatalysis Subprocess
	Equipment & Capital Costs																						Equipment & Capital Costs																						Equipment & Capital Costs
		Equipment Reference Units	Reference Capacity	Reference Cost ($ USD)	Capacity Upper Limit	Model Capacity	Number of Units	Operator Per Units	Total Operators	Scaling Factor	Reference Year	CE Index Reference Year	CE Index 2019		Delivery Included	Purchased Cost ($M USD)	Delivered Cost ($M USD)	Lang Factor	Installed Cost ($M USD)	Sources & Notes				Equipment Reference Units	Reference Capacity	Reference Cost ($ USD)	Capacity Upper Limit	Model Capacity	Number of Units	Operator Per Units	Total Operators	Scaling Factor	Reference Year	CE Index Reference Year	CE Index 2019		Delivery Included	Purchased Cost ($M USD)	Delivered Cost ($M USD)	Lang Factor	Installed Cost ($M USD)	Sources & Notes				Equipment Reference Units	Reference Capacity	Reference Cost ($ USD)	Capacity Upper Limit
	Methanol Electrolyzer	m^2	4.24	22147	None	20617.4	1	2.22	2.22	1	2020	607.5	607.5		No	128.825	135.266	1.67	225.894	Verma, S. et al. ChemSusChem, 9, 1972-1979, 2016			Methanol Electrolyzer	m^2	4.24	22147	None	20617.4	1	2.22	2.22	1	2020	607.5	607.5		No	128.825	135.266	1.67	225.894	Verma, S. et al. ChemSusChem, 9, 1972-1979, 2016			Bioreactor Inlet Liquid Pump	m^3/h	2615.82	140700	None
	Formate Electrolyzer	m^2	4.24	10139.3	None	27489.8	1	2.22	2.22	1	2020	607.5	607.5		No	93.915	98.6107	1.67	164.68	Verma, S. et al. ChemSusChem, 9, 1972-1979, 2016			Formate Electrolyzer	m^2	4.24	10139.3	None	27489.8	1	2.22	2.22	1	2020	607.5	607.5		No	93.915	98.6107	1.67	164.68	Verma, S. et al. ChemSusChem, 9, 1972-1979, 2016			Bioreactor Air Compressor	kg/h	7877.73	1.15149e+06	None
	Pressure Swing Adsorption	kmol/h	4400	9856800	None	3598.21	1	1	1	0.65	2010	550.8	607.5		No	9.53894	10.0159	4.3	43.0683	Li, X. et al. Energy and Fuels, 2016			Pressure Swing Adsorption	kmol/h	4400	9856800	None	1643.84	1	1	1	0.65	2010	550.8	607.5		No	5.73262	6.01925	4.3	25.8828	Li, X. et al. Energy and Fuels, 2016			Bireactor Air Cooler Heat Exchanger	kg/h	7877.73	14660.9	None
	Electrocatalysis Methanol Distillation	m^3/h	7461	6488800	25000	7461	1	0.5	0.5	0.675	2020	607.5	607.5		No	6.4888	6.81324	4.3	29.2969	ASPEN Plus			Electrocatalysis Methanol Distillation	m^3/h	7462.31	10774900	25000	7462.31	1	0.5	0.5	0.675	2020	607.5	607.5		No	10.7749	11.3136	4.3	48.6487	ASPEN Plus			Growth Bubble Column Reactor	m^3	670	2053840	800
	Electrocatalysis Distillation Bottoms Cooler	m^3/h	7425.67	1725650	10000	7425.67	1	0.1	0.1	0.65	2020	607.5	607.5		No	1.72565	1.81193	4.3	7.79131	ASPEN Plus			Electrocatalysis Distillation Bottoms Cooler	m^3/h	7674.16	2556530	10000	7674.16	1	0.1	0.1	0.65	2020	607.5	607.5		No	2.55653	2.68436	4.3	11.5427	ASPEN Plus			Accumulation Bubble Column Reactor	m^3	670	2029507	800
	Bioreactor Inlet Liquid Pump	m^3/h	2615.82	140700	None	2615.82	1	0	0	0.52	2020	607.5	607.5		No	0.1407	0.147735	4.3	0.635261	ASPEN Plus			Knockout Drum	m^3/h	2323.72	1368100	None	2323.72	1	0	0	0.7	2020	607.5	607.5		No	1.3681	1.43651	4.3	6.17697	ASPEN Plus			Neutralization Vessel	m^3	200	356000	500
	Bioreactor Air Compressor	kg/h	7877.73	1.15149e+06	None	7877.73	1	0.2	0.2	0.4	2020	607.5	607.5		No	1.15149	1.20907	4.3	5.19898	ASPEN Plus			Steam Compressor	kg/h	126314	1.5688e+07	600000	2183520	4	0.2	0.8	0.4	2020	607.5	607.5		No	112.69	118.324	4.3	508.795	ASPEN Plus			Biomass Gravity Belt Thickener	m^3/h	133.3	222890	200
	Bireactor Air Cooler Heat Exchanger	kg/h	7877.73	14660.9	None	7877.73	1	0.1	0.1	0.65	2020	607.5	607.5		No	0.0146609	0.0153939	4.3	0.066194	ASPEN Plus																									Biomass Decanter Centrifuge	m^3/h	114	169680	120
	Growth Bubble Column Reactor	m^3	670	2053840	800	10202.1	13	1	13	0.675	2014	576.1	607.5		No	31.3264	32.8927	4.3	141.439	Humbird et al. Biochem Eng. J. 2018			Total Equipment & Capital Costs	991.62	$M USD																				Biomass Horizontal Belt Dryer	kg/h Water Evap.	16000	1.998e+06	16000
	Accumulation Bubble Column Reactor	m^3	670	2029507	800	15673.4	20	1	20	0.675	2014	576.1	607.5		No	47.5782	49.9571	4.3	214.815	Humbird et al. Biochem Eng. J. 2018																									Biomass Dryer Air Heater	kg/h	1879330	2233650	None
	Bioreactor Off Gas Condenser	kg/h	85577.2	36018.2	None	85577.2	1	0.1	0.1	0.65	2020	607.5	607.5		No	0.0360182	0.0378191	4.3	0.162622	ASPEN Plus																									Acetone Pump	m^3/h	294.25	14100	None
	Neutralization Vessel	m^3	200	356000	500	2509.51	6	0.5	3	0.475	2014	576.1	607.5		No	3.19774	3.35763	4.3	14.4378	Humbird et al. Biochem Eng. J. 2018																									Solvent Extraction Vessel	m^3	37.85	150000	50
	Biomass Gravity Belt Thickener	m^3/h	133.3	222890	200	2509.51	13	0.1	1.3	0.6	2020	607.5	607.5		Yes	3.61846	3.61846	4.3	15.5594	Alfa Laval Quote			Feedstock & Material Handling Cost																						Biomass Disk Stack Centrifuge	m^3/h	80	277500	120
	Biomass Decanter Centrifuge	m^3/h	114	169680	120	351.128	3	0.5	1.5	0.67	2020	607.5	607.5		No	0.518103	0.544008	4.3	2.33924	GN Solids Control																									Biomass Rotary Drum Pressure Filter	m^2	37.2	311200	75
	Biomass Horizontal Belt Dryer	kg/h Water Evap.	16000	1.998e+06	16000	43241.3	3	0.5	1.5	0.71	2020	607.5	607.5		Yes	5.56575	5.56575	4.3	23.9327	Swiss Combi Quote				Reference Units	Reference Cost Per Unit ($ USD)	Capacity Units	Capacity	Cost ($M USD/year)																	Acetone/PHB Heat Exchanger	m^3/h	336.96	68824	None
	Biomass Dryer Air Heater	kg/h	1879330	2233650	None	1879330	1	0.1	0.1	0.65	2020	607.5	607.5		No	2.23365	2.34533	4.3	10.0849	ASPEN Plus			Carbon Dioxide	$/tonne	30	tonne/year	1.11735e+06	33.5204																	Precipitation Vessel	m^3	100	500000	150
	Acetone Pump	m^3/h	294.25	14100	None	294.25	1	0	0	0.52	2020	607.5	607.5		No	0.0141	0.014805	4.3	0.0636615	ASPEN Plus			Process Water	$/tonne	0.501505	tonne/year	18687060	9.37164																	PHB Gravity Belt Thickener	m^3/h	133.3	222890	200
	Solvent Extraction Vessel	m^3	37.85	150000	50	696.82	14	0.5	7	0.65	2020	607.5	607.5		No	2.50912	2.63458	4.3	11.3287	Anderson Dahlen Quote			Methanol Catalyst	$/kg	1335	kg/year	8659.3	11.5602																	PHB Rotary Drum Vacuum Filter	m^2	29.2	910000	75
	Biomass Disk Stack Centrifuge	m^3/h	80	277500	120	348.41	3	0.6	1.8	0.67	2018	603.1	607.5		Yes	1.07647	1.07647	4.3	4.6288	Fasaei et al. Algal Research, 31, 347-362, 2018			Formate Catalyst	$/kg	435	kg/year	11545.7	5.02239																	Microfilter	m^3/h	50	1500000	None
	Biomass Rotary Drum Pressure Filter	m^2	37.2	311200	75	105.575	2	0.1	0.2	0.67	2014	576.1	607.5		No	0.829755	0.871243	4.3	3.74635	Matches, 2014			Solids Handling	$/tonne	10	tonne/year	1.42089e+06	14.2089																	Acetone Distillation Column	m^3/h	540.19	2606500	None
	Acetone/PHB Heat Exchanger	m^3/h	336.96	68824	None	336.96	1	0.1	0.1	0.65	2020	607.5	607.5		No	0.068824	0.0722652	4.3	0.31074	ASPEN Plus																									Distillation Bottoms Heat Exchanger	m^3/h	122.65	56182	None
	Precipitation Vessel	m^3	100	500000	150	422.91	3	0.25	0.75	0.5	2012	584.6	607.5		No	1.85073	1.94326	4.3	8.35603	Harrison, R. G. Bioseparation Science and Engineering, 2015			Feedstock & Material Handling Cost	73.6834	$M USD/year																				Nanofilter	m^3/h	139	3000000	None
	PHB Gravity Belt Thickener	m^3/h	133.3	222890	200	422.91	3	0.1	0.3	0.6	2020	607.5	607.5		Yes	0.691496	0.691496	4.3	2.97343	Alfal Laval Quote																									PHB Horizontal Belt Dryer	tonnes/h Water Evap.	16000	1.998e+06	16000
	PHB Rotary Drum Vacuum Filter	m^2	29.2	910000	75	258.075	4	0.17	0.68	0.67	2020	607.5	607.5		No	6.19134	6.5009	4.3	27.9539	WesTech Quote
	Microfilter	m^3/h	50	1500000	None	555.34	1	1	1	1	2020	607.5	607.5		No	16.6602	17.4932	4.3	75.2208	AMS Membranes Quote (-30%/+50%)																									Total Equipment & Capital Costs	591.177	$M USD
	Acetone Distillation Column	m^3/h	540.19	2606500	None	540.19	1	0.5	0.5	0.675	2020	607.5	607.5		No	2.6065	2.73683	4.3	11.7683	ASPEN Plus			Product Credit & Operating Credit
	Distillation Bottoms Heat Exchanger	m^3/h	122.65	56182	None	122.65	1	0.1	0.1	0.65	2020	607.5	607.5		No	0.056182	0.0589911	4.3	0.253662	ASPEN Plus
	Nanofilter	m^3/h	139	3000000	None	119.85	1	1	1	1	2020	607.5	607.5		No	2.58669	2.71603	4.3	11.6789	AMS Membranes Quote (-30%/+50%)				Reference Units	Reference Cost Per Unit ($ USD)	Capacity Units	Capacity	Cost ($M USD/year)
	PHB Horizontal Belt Dryer	tonnes/h Water Evap.	16000	1.998e+06	16000	6205.26	1	0.5	0.5	0.71	2020	607.5	607.5		Yes	1.01983	1.01983	4.3	4.38529	Swiss Combi Quote			Methanol Credit	$/tonne	388.25	tonne/year	133884	-51.9804																	Feedstock & Material Handling Cost
																							Sodium Formate Credit	$/tonne	369.3	tonne/year	1.42089e+06	-524.733
	Total Equipment & Capital Costs	1062.07	$M USD																				Carbon Price Credit	$/tonne	40	tonne/year	1.10365e+06	-44.146																		Reference Units	Reference Cost Per Unit ($ USD)	Capacity Units	Capacity
																																													Methanol	$/tonne	388.25	tonne/year	133884
																							Product Credit & Operating Credit	-620.86	$M USD/year																				Sodium Formate	$/tonne	369.3	tonne/year	1.42089e+06
																																													Process Water	$/tonne	0.501505	tonne/year	164464
	Feedstock & Material Handling Cost																																												Sulfuric Acid	$/tonne	200	tonne/year	1730.4
																																													Sodium Hydroxide	$/tonne	350	tonne/year	1386
		Reference Units	Reference Cost Per Unit ($ USD)	Capacity Units	Capacity	Cost ($M USD/year)																	Equipment Operating Costs																						Ammonia	$/tonne	250	tonne/year	9017.06
	Carbon Dioxide	$/tonne	30	tonne/year	479312	14.3793																																							Acetone	$/tonne	976.6	tonne/year	18631.2
	Process Water	$/tonne	0.501505	tonne/year	2.11463e+07	10.605																					Electricity			Water			Steam			Miscellaneous									Solids Handling	$/tonne	10	tonne/year	205231
	Sulfuric Acid	$/tonne	200	tonne/year	1730.4	0.34608																					Utility Price	0.03	$/kWh	Utility Price	0.057	$/m^3	Utility Price	0.0217187	$/kg
	Sodium Hydroxide	$/tonne	350	tonne/year	1386	0.4851																		Per Unit?	Number Of Units	Scaling Factor	Usage Units	Usage	Cost ($M USD/year)	Usage Units	Usage	Cost ($M USD/year)	Usage Units	Usage	Cost ($M USD/year)	Description	Operation Units	Operation Price	Capacity	Cost ($M USD/year)					Feedstock & Material Handling Cost	600.129	$M USD/year
	Ammonia	$/tonne	250	tonne/year	9017.06	2.25427																	Methanol Electrolyzer	No	1	4862.59	kW	257717	64.9447							Maintenance	3% of capital/year	6.77682	1	6.77682
	Acetone	$/tonne	976.6	tonne/year	18631.2	18.1952																	Formate Electrolyzer	No	1	6483.45	kW	343623	86.593							Maintenance	3% of capital/year	4.9404	1	4.9404
	Methanol Catalyst	$/kg	1335	kg/year	8659.3	11.5602																	Pressure Swing Adsorption	No	1	0.3736	kW	2540.55	0.640219
	Formate Catalyst	$/kg	435	kg/year	11545.7	5.02239																	Electrocatalysis Methanol Distillation	No	1	1				kg/h	50008500	24.0161	kg/h	1014210	185.029										Product Credit & Operating Credit
	Solids Handling	$/tonne	10	tonne/year	205231	2.05231																	Electrocatalysis Distillation Bottoms Cooler	No	1	1				kg/h	53089500	25.4957
																							Knockout Drum	Yes	1	1							kg/h	395030	72.0681											Reference Units	Reference Cost Per Unit ($ USD)	Capacity Units	Capacity
	Feedstock & Material Handling Cost	64.8999	$M USD/year																				Steam Compressor	No	4	4.3216	kW	117486	29.6065																Biomass Credit	$/lb	0.5138	lb/year	2.25942e+08
																																													PHB Credit	$/tonne	4482	tonne/year	102745
																							Electricity Operating Cost	181.784	$M USD/year																				Carbon Price Credit	$/tonne	40	tonne/year	394724
																							Cooling Water Operating Cost	49.5119	$M USD/year
	Product Credit & Operating Credit																						Steam Operating Cost	257.097	$M USD/year																				Product Credit & Operating Credit	-592.383	$M USD/year
																							Miscellaneous Operating Cost	11.7172	$M USD/year
		Reference Units	Reference Cost Per Unit ($ USD)	Capacity Units	Capacity	Cost ($M USD/year)
	Biomass Credit	$/lb	0.5138	lb/year	2.25942e+08	-116.089
	PHB Credit	$/tonne	4482	tonne/year	102745	-460.505																																							Equipment Operating Costs
	Carbon Price Credit	$/tonne	40	tonne/year	394724	-15.789																	Administrative & Maintenance Operating Cost
																																																	Electricity
	Product Credit & Operating Credit	-592.383	$M USD/year																					Labour Wage ($/h)	Total Operators Per Shift	Hours Per week Per Operator	Operators Per Week Per Job	Weeks Per Year	Annual Wages ($M USD/year)																				Utility Price
																							Operating Labour	32	6.04	40	4.5	52.1786	1.81531																	Per Unit?	Number Of Units	Scaling Factor	Usage Units
																																													Bioreactor Inlet Liquid Pump	Yes	1	1	kW
																								Percent of Operating Labour	Annual Costs ($M USD/year)																				Bioreactor Air Compressor	Yes	1	1	kW
	Equipment Operating Costs																						Supervision	0.225	0.408446																				Bireactor Air Cooler Heat Exchanger	Yes	1	1
																							Laboratory	0.15	0.272297																				Growth Bubble Column Reactor	No	13	1.1713
					Electricity			Water			Steam			Miscellaneous									Overheads and Administration	0.5	0.907657																				Accumulation Bubble Column Reactor	No	20	1.16965
					Utility Price	0.03	$/kWh	Utility Price	0.057	$/m^3	Utility Price	0.0217187	$/kg																																Neutralization Vessel	No	6	2.09126	kW
		Per Unit?	Number Of Units	Scaling Factor	Usage Units	Usage	Cost ($M USD/year)	Usage Units	Usage	Cost ($M USD/year)	Usage Units	Usage	Cost ($M USD/year)	Description	Operation Units	Operation Price	Capacity	Cost ($M USD/year)						Percent of Capital Costs	Annual Maintenance ($M USD/year)																				Biomass Gravity Belt Thickener	Yes	13	1.44816	hp
	Methanol Electrolyzer	No	1	4862.59	kW	257717	64.9447							Maintenance	3% of capital/year	6.77682	1	6.77682					Maintenance	0.08	7.38009																				Biomass Decanter Centrifuge	Yes	3	1.02669	kW
	Formate Electrolyzer	No	1	6483.45	kW	343623	86.593							Maintenance	3% of capital/year	4.9404	1	4.9404																											Biomass Horizontal Belt Dryer	Yes	3	0.90086	kW
	Pressure Swing Adsorption	No	1	0.817774	kW	15692.3	3.95445																Administrative and Maintenance Operating Cost	10.7838	$M USD/year																				Biomass Dryer Air Heater	Yes	1	1
	Electrocatalysis Methanol Distillation	No	1	1				kg/h	29366900	14.1032	kg/h	796407	145.294																																Acetone Pump	Yes	1	1	kW
	Electrocatalysis Distillation Bottoms Cooler	No	1	1				kg/h	50488500	24.2466																																			Solvent Extraction Vessel	No	14	1.315	kW
	Bioreactor Inlet Liquid Pump	Yes	1	1	kW	271.278	0.0683621																																						Biomass Disk Stack Centrifuge	Yes	3	1.45171	kW
	Bioreactor Air Compressor	Yes	1	1	kW	396.783	0.0999892																Net Present Value Calculation																						Biomass Rotary Drum Pressure Filter	Yes	2	1.41902	kW
	Bireactor Air Cooler Heat Exchanger	Yes	1	1				kg/h	62847.7	0.030182																																			Acetone/PHB Heat Exchanger	Yes	1	1
	Growth Bubble Column Reactor	No	13	1.1713										Refrigerant	$/MJ	0.00277778	1.56567e+09	4.34908					Net Depreciable Capital Expenses	991.62	$M USD																				Precipitation Vessel	No	3	1.4097	kW
	Accumulation Bubble Column Reactor	No	20	1.16965										Refrigerant	$/MJ	0.00277778	4.46199e+09	12.3944					Net Operating Expenses	-36.2818	$M USD/year																				PHB Gravity Belt Thickener	Yes	3	1.05754	hp
	Bioreactor Off Gas Condenser	Yes	1	1										Refrigerant	$/MJ	0.00277778	1.80281e+07	0.050078					Operating Expenses	584.578	$M USD/year																				PHB Rotary Drum Vacuum Filter	Yes	4	2.20955	hp
	Neutralization Vessel	No	6	2.09126	kW	292.362	0.0736752																Operating Credits	-620.86	$M USD/year																				Microfilter	Yes	1	11.1068	kW
	Biomass Gravity Belt Thickener	Yes	13	1.44816	hp	4	0.0189767	gpm	60	0.122837				Maintenance	$/unit	25600	13	0.3328					Income Tax Rate	0.257																					Acetone Distillation Column	Yes	1	1
	Biomass Decanter Centrifuge	Yes	3	1.02669	kW	127	0.0985746																Nominal Interest Rate	0.1																					Distillation Bottoms Heat Exchanger	Yes	1	1
	Biomass Horizontal Belt Dryer	Yes	3	0.90086	kW	400	0.27242																																						Nanofilter	Yes	1	0.86223	kW
	Biomass Dryer Air Heater	Yes	1	1							kg/h	65915.2	12.0254										1	2	3	4	5	6	7	8	9	10	11		MACRS 10 yr										PHB Horizontal Belt Dryer	Yes	1	0.387829	kW
	Acetone Pump	Yes	1	1	kW	20.2985	0.00511522																Year	Capital Expenses	Working Capital	Depreciation	Net Profit	Tax Carryover	Tax Break	Net Earning	Discounted Cash Flow	Cash Flow (Present Value)	Cumulative Present Value		Year	% Of Total Capital Expense
	Solvent Extraction Vessel	No	14	1.315	kW	165.044	0.0415912				kg/h	9779	1.78405										0	-991.62	-49.581						-1041.2	-1041.2	-1041.2		1	10									Electricity Operating Cost	4.14112	$M USD/year
	Biomass Disk Stack Centrifuge	Yes	3	1.45171	kW	348.41	0.382377																1		0	-99.162	-62.8803	0	0	-62.8803	36.2818	32.9834	-1008.22		2	18									Cooling Water Operating Cost	7.08654	$M USD/year
	Biomass Rotary Drum Pressure Filter	Yes	2	1.41902	kW	59.122	0.0422832																2		0	-178.492	-142.21	62.8803	0	-142.21	36.2818	29.9849	-978.233		3	14.4									Steam Operating Cost	36.8758	$M USD/year
	Acetone/PHB Heat Exchanger	Yes	1	1				kg/h	1150140	0.552344													3		0	-142.793	-106.512	205.09	0	-106.512	36.2818	27.259	-950.974		4	11.52									Miscellaneous Operating Cost	18.9053	$M USD/year
	Precipitation Vessel	No	3	1.4097	kW	845.82	0.213147																4		0	-114.235	-77.9529	311.602	0	-77.9529	36.2818	24.7809	-926.193		5	9.22
	PHB Gravity Belt Thickener	Yes	3	1.05754	hp	4	0.003198	gpm	60	0.0207008				Maintenance	$/unit	25600	3	0.0768					5		0	-91.4274	-55.1456	389.555	0	-55.1456	36.2818	22.5281	-903.665		6	7.37
	PHB Rotary Drum Vacuum Filter	Yes	4	2.20955	hp	65	0.144769																6		0	-73.0824	-36.8006	444.7	0	-36.8006	36.2818	20.4801	-883.185		7	6.55
	Microfilter	Yes	1	11.1068	kW	919.088	2.57245							Filter Replacement	$/year	150000	11.1068	1.66602					7		0	-64.9511	-28.6694	481.501	0	-28.6694	36.2818	18.6183	-864.567		8	6.55									Administrative & Maintenance Operating Cost
	Acetone Distillation Column	Yes	1	1				kg/h	11827300	5.67995	kg/h	126435	23.0664										8		0	-64.9511	-28.6694	510.17	0	-28.6694	36.2818	16.9257	-847.641		9	6.56
	Distillation Bottoms Heat Exchanger	Yes	1	1				kg/h	1417060	0.68053													9		0	-65.0503	-28.7685	538.84	0	-28.7685	36.2818	15.387	-832.254		10	6.55										Labour Wage ($/h)	Total Operators Per Shift	Hours Per week Per Operator	Operators Per Week Per Job
	Nanofilter	Yes	1	0.86223	kW	299.625	0.0651031							Filter Replacement	$/year	100000	0.86223	0.086223					10		0	-64.9511	-28.6694	567.608	0	-28.6694	36.2818	13.9882	-818.266		11	3.28									Operating Labour	32	54.63	40	4.5
	PHB Horizontal Belt Dryer	Yes	1	0.387829	kW	400	0.0390931																11		0	-32.5251	3.75662	596.278	3.0053	3.56353	36.0887	12.6489	-805.617
																							12		0		36.2818	593.272	29.0254	34.4169	34.4169	10.9663	-794.65													Percent of Operating Labour	Annual Costs ($M USD/year)
	Electricity Operating Cost	159.633	$M USD/year																				13		0		36.2818	564.247	29.0254	34.4169	34.4169	9.96935	-784.681												Supervision	0.225	3.69427
	Cooling Water Operating Cost	45.4364	$M USD/year																				14		0		36.2818	535.221	29.0254	34.4169	34.4169	9.06304	-775.618												Laboratory	0.15	2.46285
	Steam Operating Cost	182.17	$M USD/year																				15		0		36.2818	506.196	29.0254	34.4169	34.4169	8.23913	-767.379												Overheads and Administration	0.5	8.20948
	Miscellaneous Operating Cost	30.6726	$M USD/year																				16		0		36.2818	477.171	29.0254	34.4169	34.4169	7.49012	-759.889
																							17		0		36.2818	448.145	29.0254	34.4169	34.4169	6.8092	-753.08													Percent of Capital Costs	Annual Maintenance ($M USD/year)
																							18		0		36.2818	419.12	29.0254	34.4169	34.4169	6.19018	-746.889												Maintenance	0.08	45.8116
																							19		0		36.2818	390.094	29.0254	34.4169	34.4169	5.62744	-741.262
	Administrative & Maintenance Operating Cost																						20		0		36.2818	361.069	29.0254	34.4169	34.4169	5.11585	-736.146												Administrative and Maintenance Operating Cost	76.5971	$M USD/year
																							21		0		36.2818	332.043	29.0254	34.4169	34.4169	4.65077	-731.495
		Labour Wage ($/h)	Total Operators Per Shift	Hours Per week Per Operator	Operators Per Week Per Job	Weeks Per Year	Annual Wages ($M USD/year)																22		0		36.2818	303.018	29.0254	34.4169	34.4169	4.22798	-727.267
	Operating Labour	32	60.77	40	4.5	52.1786	18.2643																23		0		36.2818	273.993	29.0254	34.4169	34.4169	3.84361	-723.424
																							24		0		36.2818	244.967	29.0254	34.4169	34.4169	3.4942	-719.93												Net Present Value Calculation
		Percent of Operating Labour	Annual Costs ($M USD/year)																				25		0		36.2818	215.942	29.0254	34.4169	34.4169	3.17654	-716.753
	Supervision	0.225	4.10948																				26		0		36.2818	186.916	29.0254	34.4169	34.4169	2.88776	-713.865												Net Depreciable Capital Expenses	591.177	$M USD
	Laboratory	0.15	2.73965																				27		0		36.2818	157.891	29.0254	34.4169	34.4169	2.62524	-711.24												Net Operating Expenses	151.352	$M USD/year
	Overheads and Administration	0.5	9.13217																				28		0		36.2818	128.866	29.0254	34.4169	34.4169	2.38658	-708.853												Operating Expenses	743.735	$M USD/year
																							29		0		36.2818	99.8401	29.0254	34.4169	34.4169	2.16962	-706.684												Operating Credits	-592.383	$M USD/year
		Percent of Capital Costs	Annual Maintenance ($M USD/year)																				30		247.905		284.187	70.8147	70.8147	229.35	229.35	13.1437	-693.54												Income Tax Rate	0.257
	Maintenance	0.08	52.2371																				31		0		0	0	0	0	0	0	0												Nominal Interest Rate	0.1
																							32		0		0	0	0	0	0	0	0
	Administrative and Maintenance Operating Cost	86.4827	$M USD/year																				33		0		0	0	0	0	0	0	0												1	2	3	4	5
																							34		0		0	0	0	0	0	0	0												Year	Capital Expenses	Working Capital	Depreciation	Net Profit
																							35		0		0	0	0	0	0	0	0												0	-591.177	-29.5589
																							36		0		0	0	0	0	0	0	0												1		0	-59.1177	-210.47
	Net Present Value Calculation																						37		0		0	0	0	0	0	0	0												2		0	-106.412	-257.764
																							38		0		0	0	0	0	0	0	0												3		0	-85.1295	-236.482
	Net Depreciable Capital Expenses	1062.07	$M USD																				39		0		0	0	0	0	0	0	0												4		0	-68.1036	-219.456
	Net Operating Expenses	-23.0883	$M USD/year																				40		0		0	0	0	0	0	0	0												5		0	-54.5065	-205.859
	Operating Expenses	569.295	$M USD/year																				41		0		0	0	0	0	0	0	0												6		0	-43.5698	-194.922
	Operating Credits	-592.383	$M USD/year																				42		0		0	0	0	0	0	0	0												7		0	-38.7221	-190.074
	Income Tax Rate	0.257																					43		0		0	0	0	0	0	0	0												8		0	-38.7221	-190.074
	Nominal Interest Rate	0.1																					44		0		0	0	0	0	0	0	0												9		0	-38.7812	-190.133
																							45		0		0	0	0	0	0	0	0												10		0	-38.7221	-190.074
	1	2	3	4	5	6	7	8	9	10	11		MACRS 10 yr			Chemical Engineering Cost Indices							46		0		0	0	0	0	0	0	0												11		0	-19.3906	-170.743
	Year	Capital Expenses	Working Capital	Depreciation	Net Profit	Tax Carryover	Tax Break	Net Earning	Discounted Cash Flow	Cash Flow (Present Value)	Cumulative Present Value		Year	% Of Total Capital Expense		Year	Cost Index						47		0		0	0	0	0	0	0	0												12		0		-151.352
	0	-1062.07	-53.1035						-1115.17	-1115.17	-1115.17		1	10		2000	394.1						48		0		0	0	0	0	0	0	0												13		0		-151.352
	1		0	-106.207	-83.1187	0	0	-83.1187	23.0883	20.9894	-1094.18		2	18		2001	394.3						49		0		0	0	0	0	0	0	0												14		0		-151.352
	2		0	-191.173	-168.084	83.1187	0	-168.084	23.0883	19.0813	-1075.1		3	14.4		2002	395.6						50		0		0	0	0	0	0	0	0												15		0		-151.352
	3		0	-152.938	-129.85	251.203	0	-129.85	23.0883	17.3466	-1057.76		4	11.52		2003	402																												16		0		-151.352
	4		0	-122.351	-99.2622	381.053	0	-99.2622	23.0883	15.7696	-1041.99		5	9.22		2004	444.2						Net Present Value	-693.54	$M USD																				17		0		-151.352
	5		0	-97.9229	-74.8346	480.315	0	-74.8346	23.0883	14.336	-1027.65		6	7.37		2005	468.2																												18		0		-151.352
	6		0	-78.2746	-55.1863	555.15	0	-55.1863	23.0883	13.0328	-1014.62		7	6.55		2006	496.7																												19		0		-151.352
	7		0	-69.5656	-46.4773	610.336	0	-46.4773	23.0883	11.848	-1002.77		8	6.55		2007	525.4																												20		0		-151.352
	8		0	-69.5656	-46.4773	656.813	0	-46.4773	23.0883	10.7709	-991.999		9	6.56		2008	575.4						Cost Breakdown by Major Subprocess																						21		0		-151.352
	9		0	-69.6718	-46.5835	703.29	0	-46.5835	23.0883	9.7917	-982.208		10	6.55		2009	521.9																												22		0		-151.352
	10		0	-69.5656	-46.4773	749.874	0	-46.4773	23.0883	8.90155	-973.306		11	3.28		2010	550.8						Subprocess	Capital Cost ($M USD)	Operating Cost ($M USD/year)																				23		0		-151.352
	11		0	-34.8359	-11.7476	796.351	0	-11.7476	23.0883	8.09232	-965.214					2011	585.7						Electrocatalysis	390.574	211.012																				24		0		-151.352
	12		0		23.0883	808.099	18.4707	21.9016	21.9016	6.97852	-958.235					2012	584.6						Liquid Separation	575.164	350.425																				25		0		-151.352
	13		0		23.0883	789.628	18.4707	21.9016	21.9016	6.34411	-951.891					2013	567.3						Gas Separation	25.8828	0.640219																				26		0		-151.352
	14		0		23.0883	771.157	18.4707	21.9016	21.9016	5.76737	-946.124					2014	576.1																												27		0		-151.352
	15		0		23.0883	752.687	18.4707	21.9016	21.9016	5.24307	-940.881					2015	556.8																												28		0		-151.352
	16		0		23.0883	734.216	18.4707	21.9016	21.9016	4.76642	-936.114					2016	541.7																												29		0		-151.352
	17		0		23.0883	715.746	18.4707	21.9016	21.9016	4.33311	-931.781					2017	567.5																												30		147.794		-3.55793
	18		0		23.0883	697.275	18.4707	21.9016	21.9016	3.93919	-927.842					2018	603.1																												31		0		0
	19		0		23.0883	678.804	18.4707	21.9016	21.9016	3.58108	-924.261					2019	607.5																												32		0		0
	20		0		23.0883	660.334	18.4707	21.9016	21.9016	3.25553	-921.005					2020	607.5																												33		0		0
	21		0		23.0883	641.863	18.4707	21.9016	21.9016	2.95957	-918.046																																		34		0		0
	22		0		23.0883	623.392	18.4707	21.9016	21.9016	2.69052	-915.355																																		35		0		0
	23		0		23.0883	604.922	18.4707	21.9016	21.9016	2.44593	-912.909																																		36		0		0
	24		0		23.0883	586.451	18.4707	21.9016	21.9016	2.22357	-910.686																																		37		0		0
	25		0		23.0883	567.98	18.4707	21.9016	21.9016	2.02143	-908.664																																		38		0		0
	26		0		23.0883	549.51	18.4707	21.9016	21.9016	1.83766	-906.827																																		39		0		0
	27		0		23.0883	531.039	18.4707	21.9016	21.9016	1.6706	-905.156																																		40		0		0
	28		0		23.0883	512.568	18.4707	21.9016	21.9016	1.51873	-903.637																																		41		0		0
	29		0		23.0883	494.098	18.4707	21.9016	21.9016	1.38066	-902.257																																		42		0		0
	30		265.518		288.606	475.627	230.885	273.772	273.772	15.6895	-886.567																																		43		0		0
	31		0		0	244.742	0	0	0	0	0																																		44		0		0
	32		0		0	244.742	0	0	0	0	0																																		45		0		0
	33		0		0	244.742	0	0	0	0	0																																		46		0		0
	34		0		0	244.742	0	0	0	0	0																																		47		0		0
	35		0		0	244.742	0	0	0	0	0																																		48		0		0
	36		0		0	244.742	0	0	0	0	0																																		49		0		0
	37		0		0	244.742	0	0	0	0	0																																		50		0		0
	38		0		0	244.742	0	0	0	0	0
	39		0		0	244.742	0	0	0	0	0																																		Net Present Value	-2039.05	$M USD
	40		0		0	244.742	0	0	0	0	0
	41		0		0	244.742	0	0	0	0	0
	42		0		0	244.742	0	0	0	0	0
	43		0		0	244.742	0	0	0	0	0																																		Cost Breakdown by Major Subprocess
	44		0		0	244.742	0	0	0	0	0
	45		0		0	244.742	0	0	0	0	0																																		Subprocess	Capital Cost ($M USD)	Operating Cost ($M USD/year)
	46		0		0	244.742	0	0	0	0	0																																		Biocatalysis	362.155	596.339
	47		0		0	244.742	0	0	0	0	0																																		Bioproduct Recovery and Purification	229.023	70.3899
	48		0		0	244.742	0	0	0	0	0
	49		0		0	244.742	0	0	0	0	0
	50		0		0	244.742	0	0	0	0	0
	Net Present Value	-886.567	$M USD
	Cost Breakdown by Major Subprocess
	Subprocess	Capital Cost ($M USD)	Operating Cost ($M USD/year)
	Electrocatalysis	390.574	193.105
	Liquid Separation	37.0882	183.644
	Gas Separation	43.2309	4.00453
	Biocatalysis	362.155	19.5424
	Bioproduct Recovery and Purification	229.023	70.3899
	Sources
	Variable	Source
	Electrolyzer Lang Factor	James, B. D. et al. "Guidance for Filling Out a Detailed H2A Production Case Study." Strategic Analysis Inc., 2013.
	General Lang Factor	Green, D. W., and Perry, R. H. Perry's Chemical Engineers' Handbook, Ed. 9, 2019.
	Equipment Scaling Factors	Remer, D.S. and Chai, L.H. "Process Equipment, Cost Scale-up," Encyclopedia of Chemical Processing and Design, ed., McKetta, J., Marcel Dekker, Inc., 43, 306-317, 1993.
	Electrolyzer Maintenance	DeSantis, D. et al. "H2A Current Central Hydrogen Production from Polymer Electrolyte Membrane (PEM) Electrolysis, Version 3 User Guide." National Renewable Energy Laboratory, 2019.
	Operators for Electrolyzer	DeSantis, D. et al. "H2A Current Central Hydrogen Production from Polymer Electrolyte Membrane (PEM) Electrolysis, Version 3 User Guide." National Renewable Energy Laboratory, 2019.
	Operators for General Equipment	Ulrich, G. D. "A Guide to Chemical Engineering Process Design and Economics." J. Wiley, New York, 1984.
	Steam Utility Price	EIA, "Electric Power Monthly," U.S. Energy Information Administration, 2020. Accessed August 12 2020: https://www.eia.gov/electricity/monthly/epm_table_grapher.php?t=epmt_5_6_a
	Cooling Water Utility Price	Levett, I. et al. J. Environ. Chem. Eng., 4, 3724-3733, 2016.
	Process Water Cost	Levett, I. et al. J. Environ. Chem. Eng., 4, 3724-3733, 2016; Green, D. W., and Perry, R. H. Perry's Chemical Engineers' Handbook, Ed. 9, 2019.
	Sulfuric Acid Price	Green, D. W., and Perry, R. H. Perry's Chemical Engineers' Handbook, Ed. 9, 2019.
	Sodium Hydroxide Price	Green, D. W., and Perry, R. H. Perry's Chemical Engineers' Handbook, Ed. 9, 2019.
	Ammonia Price	Eqing, R., "Downward price pressure on ammonia remains for June loadings." Independent Commodity Intelligence Services, May 2020. Accessed August 12, 2020: https://www.icis.com/explore/resources/news/2020/05/29/10513459/downward-price-pressure-on-ammonia-remains-for-june-loadings (6 Month Average)
	Acetone Price	ECHEMI, "Acetone Price Analysis," ECHEMI Technology Co., Ltd., 2020. Accessed August 12, 2020: https://www.echemi.com/productsInformation/pid_Rock3929-acetone.html (6 Month Average)
	Methanol Catalyst Price	Molbase, "CAS No.3317-67-7 Cobalt phthalocyanine," Molbase, Shanghai. Accessed August 12, 2020: http://www.molbase.com/en/cas-3317-67-7.html
	Formate Catalyst Price	SS Nano, "Tin Oxide Nanoparticles/Nanopowder." Skyspring Nanomaterials Inc. Accessed August 12, 2020: https://www.ssnano.com/inc/sdetail/tin_oxide_nanoparticles__nanopowder___sno2___99_9____50_70_nm_/235
	Hydrogen Gas Price	IEA, "The Future of Hydrogen." International Energy Agency, France, 2019.
	Solids Handling Cost	Levett, I. et al. J. Environ. Chem. Eng., 4, 3724-3733, 2016.
	Biomass Price	Clippinger, J. and Davis, R. "Techno-Economic Analysis for the Production of Algal Biomass via Closed Photobioreactors: Future Cost Potential Evaluated Across a Range of Cultivation System Designs." National Renewable Energy Laboratory, 2019. (Average MBSP using CECPI to Inflate to 2020 $ USD)
	PHB Price	Levett, I. et al. J. Environ. Chem. Eng., 4, 3724-3733, 2016. (Market Average, using CECPI to Inflate to 2020 $ USD)
	Gasoline Price	EIA, "Weekly Retail Gasoline and Diesel Prices." U.S. Energy Information Administration, 2020. Accessed August 12, 2020: https://www.eia.gov/dnav/pet/pet_pri_gnd_dcus_nus_a.htm (2019 Average)
	Diesel Price	EIA, "Weekly Retail Gasoline and Diesel Prices." U.S. Energy Information Administration, 2020. Accessed August 12, 2020: https://www.eia.gov/dnav/pet/pet_pri_gnd_dcus_nus_a.htm (2019 Average)
	Methanol Price	Methanol Institute, "Methanol Price and Supply/Demand," Methanol Institute, 2020. Accessed August 12, 2020: https://www.methanol.org/methanol-price-supply-demand/. (6 Month Average)
	Sodium Formate Price	ECHEMI, "Sodium Formate Price Analysis," ECHEMI Technology Co., Ltd., 2020. Accessed August 12, 2020: https://www.echemi.com/productsInformation/pd20150901132-sodium-formate.html (6 Month Average)
	Operator Wages	U.S. Bureau of Labor Statistics, "Occupational Employment Statistics: Chemical Plant and System Operators," United States Department of Labor, USA, 2017. Accessed August 12, 2020: https://www.bls.gov/oes/2017/may/oes518091.htm
	Maintenance Expense	Green, D. W., and Perry, R. H. Perry's Chemical Engineers' Handbook, Ed. 9, 2019.
	Administrative Expenses	Green, D. W., and Perry, R. H. Perry's Chemical Engineers' Handbook, Ed. 9, 2019.
	Income Tax Rate	Pomerleau, K. "The United States' Corporate Income Tax Rate is Now More in Line with Those Levied by Other Major Nations." Tax Foundation, 2018. https://taxfoundation.org/us-corporate-income-tax-more-competitive/
	Chemical Engineering Index	"The Chemical Engineering Plant Index," Chemical Engineering, April 2020; Green, D. W., and Perry, R. H. Perry's Chemical Engineers' Handbook, Ed. 9, 2019.
	Hydrothermal Liquefaction Expenses	Ou, L. et al. Biomass Bioenerg., 72, 45-54, 2015.
[truncated: 31 more columns]

## Sheet: Design Calculations
	Design Calculations for Process
	Calculations for the material, energy, and economic balance are provide below. All values are calculated based on user input from the Summary Table. A description of each calculation is provided before each subsection.
	Future Technology, Balanced
	Key Input variables are denoted by:	ITALICS
	Key calculated values are denoted by:	BOLD
	Bioreactor Calculations
	Yields
	Description	Symbol	Yield	Units
	Yield of Biomass from Methanol	Yx.meth	0.613	g biomass/g methanol
	Yield of Biomass from Formate	Yx,form	0.15	g biomass /g formate
	Yield of PHB from Methanol	Yphb,meth	0.54	g PHB/g methanol
	Yield of PHB from Formate	Yphb,form	0.13	g PHB /g formate
	Reaction Stoichiometry
	Growth Reactor							Accumulation Reactor
	Species	Stoichiometry	Heat of Combustion (kJ/mol)				Species	Stoichiometry	Heat of Combustion (kJ/mol)
	Reactants						Reactants
	CH3OH	4	-715				CH3OH	4	-715
	HCOO	20	-254.6				HCOO	20	-254.6
	O2	2.16216					O2	1.26452
	NH3	1.08809					NH3	0
	Products						Products
	CO2	15.5036					CO2	15.3462
	H2O	12.2239					H2O	11.5097
	PHB	0	-1888				PHB	2.16344	-1888
	Biomass	2.31509	-2045				Biomass	0	-2045
	Heat of Reaction		-1389.86				Heat of Reaction		-1787.63
	Overall Yields
	Description	Symbol	Yield	Units
	Overall Substrate to Biomass Yield	Ygrowth	0.207694	g biomass/g substrate
	Overall Substrate to PHB Yield	Yaccumulation	0.18109	g PHB/g substrate
	Bioreactor Mass Balance
	Description	Value	Units
	Bioreactor PHB Mass Flow Out	12374	kg/h PHB
	Description	Value	Units
	CH3OH Concentration	0.0060603	wt frac.
	HCOO Concentration	0.0425715	wt frac.
	Max CH3OH Concentration	0.05	wt frac.
	Max HCOO Concentration	0.044	wt frac.
	Growth Reactor Mass Balance	kg/h					Accumulation Reactor Mass Balance	kg/h					Overall Reactor Mass Balance	kg/h
	Species	In	Out	Generated	Required		Species	In	Out	Generated	Required		Species	In	Out	Generated
	PHB	0	0	0	0		PHB	0	12374	12374	12374		PHB	0	12374	12374
	Biomass	0	12374	12374	12374		Biomass	12374	0	-12374	0		Biomass	0	0	0
	CH3OH	7423.95	0	-7423.95	7423.95		CH3OH	8514.61	0	-8514.61	8514.61		CH3OH	15938.6	0	-15938.6
	HCOO	52154.1	0	-52154.1	52154.1		HCOO	59816.2	0	-59816.2	59816.2		HCOO	111970	0	-111970
	NaHCOO	78789.1	0	-78789.1	78789.1		NaHCOO	90364.1	0	-90364.1	90364.1		NaHCOO	169153	0	-169153
	Phosphorus	371.22	0	-371.22	371.22		Phosphorus	0	0	0	0		Phosphorus	371.22	0	-371.22
	Salt	494.96	0	-494.96	494.96		Salt	0	0	0	0		Salt	371.22	0	-371.22
	NH3	1073.46	0	-1073.46	1073.46		NH3	0	0	0	0		NH3	1073.46	0	-1073.46
	Dead Biomass	0	0	0	0		Dead Biomass	0	12374	12374	0		Dead Biomass	0	12374	12374
	Water	1.16543e+06	1.17819e+06	12756.3	12756.3		Water	2.51484e+06	2.52862e+06	13775.6	13775.6		Water	2.50209e+06	2.52862e+06	26531.9
	O2	4715.05	707.258	-4007.8	4007.8		O2	3162.68	474.401	-2688.27	2688.27		O2	7877.73	1181.66	-6696.07
	CO2	0	39524.6	39524.6	39524.6		CO2	0	44871	44871	44871		CO2	0	84395.6	84395.6
	Gas Total	4715.05	40231.8				Gas Total	3162.68	45345.4				Gas Total	7877.73	85577.2
	Bioreactor Energy Balance
	Growth Reactor						Accumulation Reactor
	Reaction	Heat of Reaction (kJ/mol)	Product Generated (kg/h)	Heat (MW)			Reaction	Heat of Reaction (kJ/mol)	Product Generated (kg/h)	Heat (MW)
	Hr,biomass	-1389.86	12374	51.7748			Hr,biomass	-1389.86	0	0
	Hr,PHB	-1787.63	0	0			Hr,PHB	-1787.63	12374	71.3726
	Hr,combustion	-2045	0	0			Hr,combustion	-2045	12374	76.1799
	Total Heat Generated			51.7748			Total Heat Generated			147.553
	Volume Determination
	Description	Value	Units
	Max Volume Per Reactor	800	m^3
	Biomass Cell Density	10.1072	g/L
	PHB Cell Density	9.55286	g/L
	Dilution Rate/Growth Rate	0.2	h^-1
	Growth Fill Time	5	h
	Growth Empty Time	0.666667	h
	Accumulation Batch Time	5	h
	Volume with Biomass as Limiting Species
	Growth Reactor Mass Balance Calculation						Accumulation Reactor Mass Balance Calculation
	Equation						Equation
	Accumulation = In - Out + Generation - Consumption						Accumulation = In - Out + Generation - Consumption
	dXV/dt = Q,out + u.X.V						dXV/dt = Q,gen
	Constants						Solution at t = 5 h
	Q,out	86308.7					XV (kg)	123740
	k	49396.6					Volume (m^3)	12953.2
	A	-145578					Number of Reactors	17
	B	35821.5
	Solution at t = 4.33 h
	XV (kg)	85218.1
	Volume (m^3)	8431.46
	Number of Reactors	11
	Volume with Batch Time as Limitation
	Growth Reactor Batch Time Calculation						Accumulation Reactor Batch Time Calculation
	Variable	Value	Units				Variable	Value	Units
	Density Water	993	kg/m^3				Density Water	993	kg/m^3
	Density CH3OH	773.8	kg/m^3				Density CH3OH	773.8	kg/m^3
	Density NaHCOO	1920	kg/m^3				Density NaHCOO	1920	kg/m^3
	Growth Electrolyte Volume Flow	1224.28	m^3/h				Accumulation Electrolyte Volume Flow	2590.64	m^3/h
	Required Growth Reactor Volume	6121.4	m^3				Required Accumulation Reactor Volume	12953.2	m^3
	Number of Reactors	8					Number of Reactors	17
	Volume with Oxygen Mass Transfer Limitation
	Growth Reactor Oxygen Mass Transfer Calculation						Accumulation Reactor Oxygen Mass Transfer Calculation						kLa Calculation for Oxygen, assuming Water Properties @ 38 C
	Description	Symbol	Value	Units			Description	Symbol	Value	Units
	Inlet Gas Pressure	Pin	400000	Pa			Inlet Gas Pressure	Pin	400000	Pa			Variable	Value	Units
	Inlet Gas Temperature	Tin	313.15	K			Inlet Gas Temperature	Tin	313.15	K			Gas Holdup	0.1	-
	Inlet Gas Conc.	Cin	153.638	mol/m^3			Inlet Gas Conc.	Cin	153.638	mol/m^3			Liquid Phase Diffusivity	3.113e-09	m^2/s
	Inlet Oxygen Fraction	CO2,in,frac	0.21	vol/vol			Inlet Oxygen Fraction	CO2,in,frac	0.21	vol/vol			Reactor Diameter	1.5	m
	Inlet Oxygen Conc.	CO2,in,mol	32.2639	mol/m^3			Inlet Oxygen Conc.	CO2,in,mol	32.2639	mol/m^3			Kinematic Viscosity of Liquid	6.839e-07	m^2/s
	Inlet Oxygen Conc.	CO2,in,mass	1.03241	g/L			Inlet Oxygen Conc.	CO2,in,mass	1.03241	g/L			Growth Reactor Liquid Density	996.828	kg/m^3
													Accumulation Reactor Liquid Density	996.274	kg/m^3
	Outlet Gas Pressure	Pout	400000	Pa			Outlet Gas Pressure	Pout	400000	Pa			Surface Tension	0.07164	kg/s^2
	Outlet Gas Temperature	Tout	311.15	K			Outlet Gas Temperature	Tout	311.15	K			Growth Liquid Phase Mass Transfer Coefficient	0.0484928	1/s
	Outlet Gas Conc.	Cout	154.625	mol/m^3			Outlet Gas Conc.	Cout	154.625	mol/m^3			Accumulation Liquid Phase Mass Transfer Coefficient	0.0484761	1/s
	Outlet Oxygen Fraction	CO2,out,frac	0.0240197	vol/vol			Outlet Oxygen Fraction	CO2,out,frac	0.0143326	vol/vol
	Outlet Oxygen Conc.	CO2,out,mol	3.71404	mol/m^3			Outlet Oxygen Conc.	CO2,out,mol	2.21618	mol/m^3
	Outlet Oxygen Conc.	CO2,out,mass	0.118846	g/L			Outlet Oxygen Conc.	CO2,out,mass	0.0709157	g/L
													Henry's Law Calculation
	O2 Conc. In Liquid	CLa	0.000485885	g/L			O2 Conc. In Liquid	CLa	0.00028993	g/L
	Overall Gas Phase Mass Transfer Coefficient	CGa	0.00132171	1/s			Overall Gas Phase Mass Transfer Coefficient	CGa	0.00132126	1/s			Description	Variable	Value	Units
	Log Mean O2 Concentration in Liquid	CL,LM	0.0107936	g/L			Log Mean O2 Concentration in Liquid	CL,LM	0.00925914	g/L			Henry's Constant for Solubility in Water @ 298 K	Hcp,amb	1.3e-05	mol/kg.bar
													Temperature Dependence Constant	dT	1500	K
	Volumetric Mass Transfer	NO2	1.88428	kg/h.m^3			Volumetric Mass Transfer	NO2	1.61585	kg/h.m^3			Henry Solubility	Hcp @ 38 C	1.05355e-05	mol/kg.bar
	Required Volume	V	2126.96	m^3			Required Volume	V	1663.69	m^3			Henry Solubility	Hcc	0.0272558	-
	Number of Reactors	Nreactors	3				Number of Reactors	Nreactors	3
	Final Reactor Volume
	Reactor	Volume	Units
	Growth Reactor	8431.46	m^3
	Accumulation Reactor	12953.2	m^3
	Bioreactor Design
	Reactor Dimensions										Variables for Gas Velocity Calculation
	Growth Reactor						Accumulation Reactor				Variables	Growth Reactor	Accumulation Reactor	Units
	Growth Reactor	Value	Units				Accumulation Reactor	Value	Units		Liquid Density	996.828	996.274	kg/m^3
	Liquid Volume	8431.46	m^3				Liquid Volume	12953.2	m^3		Head Pressure	400000	400000	Pa
	Gas Holdup	0.1	-				Gas Holdup	0.1	-		Gas Molar Flow Rate	2.92361	1.37273	mol/s
	Working Volume	9274.6	m^3				Working Volume	14248.5	m^3
	Head Space	0.1	-				Head Space	0.1	-
	Total Volume	10202.1	m^3				Total Volume	15673.4	m^3
	Number of Reactors	14					Number of Reactors	20
	Volume per Reactor	728.719	m^3				Volume per Reactor	783.668	m^3
	Height:Diameter Ratio	6					Height:Diameter Ratio	6
	Reactor Diameter	5.36751	m				Reactor Diameter	5.49917	m
	Reactor Height	32.2051	m				Reactor Height	32.995	m
	Working Height	29.2773	m				Working Height	29.9955	m
	Bubble Path Length	58.5547	m				Bubble Path Length	59.9909	m
	Draft Tube Diameter	0.646058	m				Draft Tube Diameter	0.484932	m
	Draft Tube Cross-Sectional Area	0.327818	m^2				Draft Tube Cross-Sectional Area	0.184693	m^2
	Superficial Gas Velocity	0.0357995	m/s				Superficial Gas Velocity	0.0295962	m/s
	Target Function to Set to 0	3.81106e-06					Target Function	5.45355e-06
	Heat Transfer
	Growth Reactor						Accumulation Reactor
	Growth Reactor	Value	Units				Accumulation Reactor	Value	Units
	Heat Generated Per Reactor	3.6982	MW				Heat Generated Per Reactor	7.37763	MW
	Cooling Jacket Heat Transfer Coefficient	454	W/m^2.K				Cooling Jacket Heat Transfer Coefficient	454	W/m^2.K
	Jacket Area	516.317	m^2				Jacket Area	541.957	m^2
	Log Mean Temperature	24.7469	K				Log Mean Temperature	24.7469	K
	Heat Removed by Cooling Jacket	5.80088	MW				Heat Removed by Cooling Jacket	6.08895	MW
	Draft Tube Length	19.323	m				Draft Tube Length	19.797	m
	Draft Tube Area	39.219	m^2				Draft Tube Area	30.1599	m^2
	Heat Removed by Draft Tube Cooling Jacket	0.44063	MW				Heat Removed by Draft Tube Cooling Jacket	0.33885	MW
	Cooling Coil Space Off Walls	0.3	m				Cooling Coil Space Off Walls	0.3	m
	Cooling Coil Diameter	4.76751	m				Cooling Coil Diameter	4.89917	m
	Coil Diameter	0.139	m				Coil Diameter	0.139	m
	Coil Pitch	0.283	m				Coil Pitch	0.283	m
	Heat Removed by Cooling Coils	-2.54331	MW				Heat Removed by Cooling Coils	0.949831	MW
	Heat Transfer Coefficient	681	W/m^2.K				Heat Transfer Coefficient	681	W/m^2.K
	Coil Area	6.54043	m^2				Coil Area	6.72105	m^2
	Number of Coils	-24					Number of Coils	9
	Length of Coils	-6.792	m				Length of Coils	2.547	m
	Electrocatalysis Calculations
	Electrolyzer Power and Size Calculation
	Methanol Electrolyzer						Formate Electrolyzer
	Variable	Value	Units				Variable	Value	Units
	Flow Rate	15938.6	kg/h				Flow Rate	111970	kg/h
	Faradaic Efficiency	0.776					Faradaic Efficiency	0.97
	Electrons Per Product Molecule	6					Electrons Per Product Molecule	2
	Voltage	2.5	V				Voltage	2.5	V
	Current Density	0.5	A/cm^2				Current Density	0.5	A/cm^2
	Power Requirement	257717	kW				Power Requirement	343623	kW
	Area	20617.4	m^2				Area	27489.8	m^2
	Catalyst Density	1	mg/cm^2				Catalyst Density	1	mg/cm^2
	Catalyst Lifetime	200	h				Catalyst Lifetime	200	h
	Catalyst Required Per Cycle	206.174	kg				Catalyst Required Per Cycle	274.898	kg
	Catalyst Required Per Year	8659.3	kg/year				Catalyst Required Per Year	11545.7	kg/year
	Electrolyzer Cost Calculation
	Methanol Electrolyzer						Formate Electrolyzer
	Material	Cost per Part ($ USD)	Number of Parts	Total Cost	Units		Material	Cost per Part ($ USD)	Number of Parts	Total Cost (Cost Indice Adjusted from 2013 to 2019)	Units
	Aluminum End Plate	40.24	2	86.183	$		Aluminum End Plate	40.24	2	86.183	$
	Bipolar Graphite Plate	6.81	107	780.305	$		Bipolar Graphite Plate	6.81	107	780.305	$
	PTFE Flow Channel			1172.82	$		PTFE Flow Channel			1172.82	$
	Gaskets	2.62	212	594.8	$		Gaskets	2.62	212	594.8	$
	Tie Rods			42.8345	$		Tie Rods			42.8345	$
	Membrane	3432	4.24	14551.7	$		Membrane	600	4.24	2544	$
	Cathode Electrode	860	4.24	3646.4	$		Cathode Electrode	860	4.24	3646.4	$
	Anode Electrode	300	4.24	1272	$		Anode Electrode	300	4.24	1272	$
	Total			22147	$/4.24 m^2		Formate Total			10139.3	$/4.24 m^2
	Additional Equipment Calculations
	Rotary Drum Vacuum Filter Area Calculation
	Variable	Value	Units
	Filter Capacity	800	L/m^2.h
	Filter Throughput	206460	L/h
	Filter Size	258.075	m^2
	Rotary Drum Pressure Filter Area Calculation
	Variable	Value	Units
	Filter Capacity	800	L/m^2.h
	Filter Throughput	84460	L/h
	Filter Size	105.575	m^2
	Pressure Swing Adsorption Energy Calculation
	For Full Process				For Electrocatalysis Subprocess
	Variable	Value	Units		Variable	Value	Units
	Energy for PSA	561	kJ/kg of CO2		Energy for PSA	561	kJ/kg of CO2
	CO2 Throughput	100699	kg/h		CO2 Throughput	16303	kg/h
	Energy Required	15692.3	kW		Energy Required	2540.55	kW
	Neutralization Vessel Stirrer Power Calculation
	Reynolds Number is assumed to be very large
	Variable	Value	Units
	Reactor Volume	418.252	m^3
	Diameter	8.10556	m
	Area	51.6007	m^2
	Bulk Velocity	0.135	m/s
	Impeller Diameter to Tank Diameter Ratio	0.25
	Pumping Number	0.87
	Impeller Speed	57.7368	revs/min
	Power Number	1.37
	Efficiency	0.85
	Density of Water @ 38 C	993	kg/m^3
	Power Per Vessel	48.727	kW
	Total Power	292.362	kW
	Extraction Vessel Stirrer Power Calculation
	Reynolds Number is assumed to be very large
	Variable	Value	Units
	Reactor Volume	49.7729	m^3
	Diameter	3.98689	m
	Area	12.4841	m^2
	Bulk Velocity	0.135	m/s
	Impeller Diameter to Tank Diameter Ratio	0.25
	Pumping Number	0.87
	Impeller Speed	117.382	revs/min
	Power Number	1.37
	Efficiency	0.85
	Density of Water @ 38 C	993	kg/m^3
	Power Per Vessel	11.7889	kW
	Total Power	165.044	kW
	Disk Stack Centrifuge Power Calculation
	Variable	Value	Units
	Energy Per Flow Volume	1	kWh/m^3
	Flow Rate	348.41	m^3/h
	Power	348.41	kW
	Rotary Drum Pressure Filter Power Calculation
	Variable	Value	Units
	Energy Per Flow Volume	0.7	kWh/m^3
	Flow Rate	84.46	m^3/h
	Power	59.122	kW
	Nanofilter Power Calculation
	Variable	Value	Units
	Energy Per Flow Volume	2.5	kWh/m^3
	Flow Rate	119.85	m^3/h
	Power	299.625	kW
	Microfilter Power Calculation
	Variable	Value	Units
	Energy Per Flow Volume	1.655	kWh/m^3
	Flow Rate	555.34	m^3/h
	Power	919.088	kW
	User Specified Steam Requirement for Electrocatalysis Distillation
	Variable	Value	Units
	Ratio of CO2 to Water	0.0038311	-
	Ratio of CO2 to KHCO3	0.053167	-
	Reference Molar Flow Rate to Distillation	298207	kmol/h
	Reference Molar Flow Rate of Vapor in Distillation	42816.4	kmol/h
	Calculated Molar Flow Rate of Distillate	16299.1	kmol/h
	Calculated Molar Flow Rate of Vapor in Distillation	43918.1	kmol/h
	Sources
	Variable	Source
	Biomass and PHB Yields	Cho, D. H. et al. Korean Chem. Eng. Res., 54 (5), 719-721, 2016.
	Biomass and PHB Cell Densities	Levett, I. et al. J. Environ. Chem. Eng., 4, 3724-3733, 2016.
	Dilution Rate/Growth Rate	Peyraud et al. BMC Syst. Biol., 5, 189, 2011.
	Biomass Heat of Reaction	x`
	PHB Heat of Reaction	Levett, I. et al. J. Environ. Chem. Eng., 4, 3724-3733, 2016.
	Bioreactor Design Process	Levett, I. et al. J. Environ. Chem. Eng., 4, 3724-3733, 2016.
	kLa Calculation	Akita, K. and Yoshida, F. Ind. Eng. Chem. Process Des. Develop., 12 (1), 76-80, 1973.
	Henry's Law Data	Sander, R. Atmos. Chem. Phys., 15, 4399-4981, 2015.
	Electrolyzer Calculations	Jouny, M. et al. Ind. Eng. Chem. Res., 57, 2165-2177, 2018.
	Electrolyzer Material Costs	Verma, S. et al. ChemSusChem, 9, 1972-1979, 2016. (Using CECPI to Inflate to 2020 $ USD)
	Methanol Membrane Cost	Dioxide Materials, "Sustanion X37-50 Grade 60 Membrane." Accessed August 12, 2020: https://dioxidematerials.com/product/sustainion-anion-exchange-membrane/
	Methanol Anode Cost
	Methanol Cathode Cost	Freudenberg, "Freudenberg H14C9." Freudenberg Performance Materials SE & Co. KG. Accessed August 12, 2020: https://fuelcellcomponents.freudenberg-pm.com/Products/gas-diffusion-layers
	Formate Membrane Cost	FumaTech, "FAB-PK-130 Fumasep Membrane." Accessed August 12, 2020: https://www.fumatech.com/EN/index.html
	Formate Anode Cost
	Formate Cathode Cost	Freudenberg, "Freudenberg H14C9." Freudenberg Performance Materials SE & Co. KG, 2020. (Bulk Quote)
	Rotary Drum Filter Capacity	Green, D. W., and Perry, R. H. Perry's Chemical Engineers' Handbook, Ed. 9, 2019.
	Energy Usage for PSA	Riboldi, L. and Bolland, O. Energy Procedia, 114, 2390-2400, 2017.
	Stirrer Power Calculations	Chopey, N. P. "Liquid Agitation" in Handbook of Chemical Engineering Calculatons, Ed. 3, 2003
	Rotary Drum Pressure Filter Energy Per Volume	Fasaei, F. et al. Algal Res., 31, 347-362, 2018.
	Disk Stack Centrifuge Energy Per Volume	Fasaei, F. et al. Algal Res., 31, 347-362, 2018.
	Nanofilter Energy Per Volume	Wafi, M. K. et al. Sn Appl. Sci., 1, 751, 2019.
	Microfilter Energy Per Volume	Fasaei, F. et al. Algal Res., 31, 347-362, 2018.

## Sheet: Process Emissions
	Process Emissions
	Emissions from operation are provided over the specified plant lifetime, as well as on a per tonne of PHB basis.
	Note: All capacity upper limits for the equipment and capital costs are user specified and can be changed as needed.
	Future Technology, Balanced
	Individual emissions sources and emissions are denoted by columns in:
	Overall emissions are denoted by cells in:
	Overall emissions with no CO2 capture are denoted by cells in:
	Full Process
	Materials for Construction & Decommissioning Emissions
		Reference Units	Reference Capacity	Emission Units	Reference Emissions	Capacity Units	Capacity	Emission Units	Emissions	Functional Unit	Emissions
	Materials for Construction and Decommissioning	tonne PHB	102748	tCO2	292807	tonne PHB	102748	tCO2	292807	tCO2/tPHB	0.094992
	Total Construction Emissions	292807	tCO2	0.094992	tCO2/tPHB
	Feedstock Emissions
		Reference Units	Reference Emissions	Capacity Units	Capacity	Emission Units	Emissions	Functional Unit	Emissions
	CO2	tCO2/tonne	-1	tonne/year	394724	tCO2	-11841732	tCO2/tPHB	-3.84167
	Process Water	tCO2/tonne	0.0003276	tonne/year	2.11463e+07	tCO2	207826	tCO2/tPHB	0.0674225
	Sulfuric Acid	tCO2/tonne	0.00405	tonne/year	1730.4	tCO2	210.244	tCO2/tPHB	6.82069e-05
	Sodium Hydroxide	tCO2/tonne	1.376	tonne/year	1386	tCO2	57214.1	tCO2/tPHB	0.0185613
	Ammonia	tCO2/tonne	2.4	tonne/year	9017.06	tCO2	649229	tCO2/tPHB	0.210622
	Acetone	tCO2/tonne	2.199	tonne/year	18631.2	tCO2	1.2291e+06	tCO2/tPHB	0.398743
	Methanol Catalyst	tCO2/tonne	17.1	tonne/year	8.6593	tCO2	4442.22	tCO2/tPHB	0.00144114
	Formate Catalyst	tCO2/tonne	8.3	tonne/year	11.5457	tCO2	2874.89	tCO2/tPHB	0.000932666
	Total Feedstock & Materials Emissions	-9.69084e+06	tCO2	-3.14388	tCO2/tPHB
	Utility Emissions
		Reference Units	Reference Emissions	Capacity Units	Capacity	Emission Units	Emissions	Functional Unit	Emissions
	Electricity	tCO2/kWh	1.50063e-05	kWh/year	5.22171e+09	tCO2	2.35076e+06	tCO2/tPHB	0.762628
	Cooling Water	tCO2/tonne	0.0003276	tonne/year	7.92227e+08	tCO2	7.78601e+06	tCO2/tPHB	2.52592
	Steam	tCO2/tonne	0.00940562	tonne/year	8.3877e+06	tCO2	2.36675e+06	tCO2/tPHB	0.767816
	Total Utility Emissions	1.25035e+07	tCO2	4.05637	tCO2/tPHB
	Net Emissions
	Net Lifetime Emissions (CO2 sourced from DAC)	3.10548	MtCO2	1.00748	tCO2/tPHB
	Net Annual Emissions (CO2 sourced from DAC)	0.103516	MtCO2/year	1.00748	tCO2/tPHB/year
	Net Lifetime Emissions (Point source CO2)	14.9472	MtCO2	4.84915	tCO2/tPHB
	Net Annual Emissions (Point source CO2)	0.498241	MtCO2/year	4.84915	tCO2/tPHB/year
	Emissions Without CCUS Plant
	Net Lifetime Emissions	11.8417	MtCO2	3.84167	tCO2/tPHB
	Net Annual Emissions	0.394724	MtCO2/year	3.84167	tCO2/tPHB/year
	Sources
	Variable	Source
	Construction and Decommissioning Reference Emissions	Wernet, G.et al., Int. J. Life Cycle Assess., 21(9), 1218–1230, 2016.
	Water, Sodium Hydroxide, Ammonia Emissions Intensity	Johnston, A. H. and Karanfil, T. J. Am. Water Works Ass., 105(7), E363-E371, 2013.
	Tin and Cobalt Emissions Intensity	Nuss, P. and Eckelman, M. J. PLOS, 9(7), e101298, 2014.
	Acetone Emissions Intensity	Amelio, A. et al. Green Chem. 16, 3045-3063, 2014.
	Sulfuric Acid Emissions Intensity	EPA, "AP 42, Fifth Edition, Volume I, Chapter 8: Inorganic Chemical Industry." United States Environmental Protection Agency, 1993.

## Sheet: ASPEN Material Balance Example
	Example Material Balance from ASPEN Plus
	We provide an example of the material balance in the ASPEN Plus model, using the future technology, balanced scenario.
	Stream labels correspond to those on the process flow diagram
	Future Technology, Balanced Scenario
	Units:
	Material Balances	kg/h
	Temperature	C
	Pressure	Bar
	Electrocatalysis
		G-1	G-2	G-F1	G-F2	G-F3	L-F1	L-F2	L-F3	L-F4	L-F5	G-M1	G-M2	G-M3	L-M1	L-M2	L-M3	L-M4	L-M5	CW-1	CW-2	L-M6	G-3	G-4	G-5	G-6	G-7	L-1
	PHB	0	0	0	0	0	0	0	0	0	0	0	0	0	0	0	0	0	0	0	0	0	0	0	0	0	0	0
	Biomass	0	0	0	0	0	0	0	0	0	0	0	0	0	0	0	0	0	0	0	0	0	0	0	0	0	0	0
	Water	0	0	0	0	0	2188790	31405600	31401200	29216800	2184370	0	0	0	297120	5257780	5195400	4934140	4934140	0	0	261265	0	0	0	0	0	2445630
	Potassium Carbonate	0	0	0	0	0	0	0	0	0	0	0	0	0	0	757899	757899	757899	757899	0	0	0	0	0	0	0	0	0
	Methanol	0	0	0	0	0	0	0	0	0	0	0	0	0	0	56101.7	72044.8	56101.7	56101.7	0	0	15943	0	0	0	0	0	15943
	Sodium Formate (Buffer)	0	0	0	0	0	0	2263010	2263010	2263010	0	0	0	0	0	0	0	0	0	0	0	0	0	0	0	0	0	0
	Sodium Formate	0	0	0	0	0	0	0	169190	0	169190	0	0	0	0	0	0	0	0	0	0	0	0	0	0	0	0	169191
	Acetone	0	0	0	0	0	0	0	0	0	0	0	0	0	0	0	0	0	0	0	0	0	0	0	0	0	0	0
	Sodium Hydroxide	0	0	0	0	0	0	0	0	0	0	0	0	0	0	0	0	0	0	0	0	0	0	0	0	0	0	0
	Sulfuric Acid	0	0	0	0	0	0	0	0	0	0	0	0	0	0	0	0	0	0	0	0	0	0	0	0	0	0	0
	Ammonia	0	0	0	0	0	0	0	0	0	0	0	0	0	0	0	0	0	0	0	0	0	0	0	0	0	0	0
	Sodium Sulfate	0	0	0	0	0	0	0	0	0	0	0	0	0	0	0	0	0	0	0	0	0	0	0	0	0	0	0
	Carbon Dioxide	57060.9	147690	120318	0	10829	0	0	0	0	0	27372	0	5474	0	0	0	0	0	0	0	0	100699	90629	10070	0	0	0
	Oxygen	0	58	47	43741	47	0	0	0	0	0	11	39804	11	0	0	0	0	0	0	0	0	1246	58	1188	83545	75670	0
	Nitrogen	0	0	0	0	0	0	0	0	0	0	0	0	0	0	0	0	0	0	0	0	0	0	0	0	0	0	0
	Water Vapor	0	0	0	0	0	0	0	0	0	0	0	0	0	0	0	0	0	0	0	0	0	0	0	0	0	0	0
	Hydrogen	0	123	100	0	596	0	0	0	0	0	23	0	2029	0	0	0	0	0	0	0	0	2625	123	2502	0	0	0
	Cooling Water	0	0	0	0	0	0	0	0	0	0	0	0	0	0	0	0	0	0	50488500	50488500	0	0	0	0	0	0	0
	Refrigerant	0	0	0	0	0	0	0	0	0	0	0	0	0	0	0	0	0	0	0	0	0	0	0	0	0	0	0
	Steam	0	0	0	0	0	0	0	0	0	0	0	0	0	0	0	0	0	0	0	0	0	0	0	0	0	0	0
	Total	57060.9	147871	120465	43741	11472	2188790	33668610	33833400	31479810	2353560	27406	39804	7514	297120	6.07178e+06	6.02534e+06	5.74814e+06	5.74814e+06	50488500	50488500	277208	104570	90810	13760	83545	75670	2630764
	Temperature	25	25	25	25	25	25	25	25	25	25	25	25	25	25	49	49	100	50	25	30	98	21	25	25	25	25	33
	Pressure	1.01325	1.01325	1.01325	1.01325	1.01325	1.01325	1.01325	1.01325	1.01325	1.01325	1.01325	1.01325	1.01325	1.01325	1.01325	1.01325	1.01325	1.01325	1.01325	1.01325	1.01325	1.01325	1.01325	1.01325	1.01325	1.01325	1.01325
	Bioconversion
		G-BR1	G-BR2	G-BR3	CW-3	CW-4	G-BR4	G-BR5	L-2	L-3	L-4	AMM-1	CW-5	CW-6	L-5	CW-7	CW-8	SA-1	SA-2	L-6	G-BR6	G-BR7	G-BR8	G-BR9	G-BR10	CW-9	CW-10
	PHB	0	0	0	0	0	0	0	0	0	0	0	0	0	0	0	0	0	0	12377	0	0	0	0	0	0	0
	Biomass	0	0	0	0	0	0	0	0	0	0	0	0	0	12377	0	0	0	0	12377	0	0	0	0	0	0	0
	Water	0	0	0	0	0	0	0	2445630	1139140	1306490	0	0	0	1151760	0	0	4	4	2471950	0	0	0	0	469	0	0
	Potassium Carbonate	0	0	0	0	0	0	0	0	0	0	0	0	0	0	0	0	0	0	0	0	0	0	0	0	0	0
	Methanol	0	0	0	0	0	0	0	15943	7426	8517	0	0	0	0	0	0	0	0	0	0	0	0	0	0	0	0
	Sodium Formate (Buffer)	0	0	0	0	0	0	0	0	0	0	0	0	0	0	0	0	0	0	0	0	0	0	0	0	0	0
	Sodium Formate	0	0	0	0	0	0	0	0	0	0	0	0	0	0	0	0	0	0	0	0	0	0	0	0	0	0
	Acetone	0	0	0	0	0	0	0	169191	78807	90385	0	0	0	0	0	0	0	0	0	0	0	0	0	0	0	0
	Sodium Hydroxide	0	0	0	0	0	0	0	0	0	0	0	0	0	0	0	0	0	0	0	0	0	0	0	0	0	0
	Sulfuric Acid	0	0	0	0	0	0	0	0	0	0	0	0	0	0	0	0	202	202	202	0	0	0	0	0	0	0
	Ammonia	0	0	0	0	0	0	0	0	0	0	1074	0	0	0	0	0	0	0	0	0	0	0	0	0	0	0
	Sodium Sulfate	0	0	0	0	0	0	0	0	0	0	0	0	0	0	0	0	0	0	0	0	0	0	0	0	0	0
									0
	Carbon Dioxide	0	0	0	0	0	0	0	0	0	0	0	0	0	0	0	0	0	0	0	39554	44862	84396	84396	0	0	0
	Oxygen	7875	7875	7875	0	0	4713	3161	0	0	0	0	0	0	0	0	0	0	0	0	705	482	1187	1187	0	0	0
	Nitrogen	0	0	0	0	0	0	0	0	0	0	0	0	0	0	0	0	0	0	0	0	0	0	0	0	0	0
	Water Vapor	0	0	0	0	0	0	0	0	0	0	0	0	0	0	0	0	0	0	0	341	229	570	100	0	0	0
	Hydrogen	0	0	0	0	0	0	0	0	0	0	0	0	0	0	0	0	0	0	0	0	0	0	0	0	0	0
	Cooling Water	0	0	0	272552	272552	0	0	0	0	0	0	6882572	6882572	0	13240884	13240884	0	0	0	0	0	0	0	0	0	0
	Refrigerant	0	0	0	0	0	0	0	0	0	0	0	0	0	0	0	0	0	0	0	0	0	0	0	0	702843	702843
	Steam	0	0	0	0	0	0	0	0	0	0	0	0	0	0	0	0	0	0	0	0	0	0	0	0	0	0
	Total	7875	7875	7875	272552	272552	4713	3161	2630764	1225373	1405392	1074	6882572	6882572	1164137	13240884	13240884	206	206	2496906	40600	45573	86153	85683	469	702843	702843
	Temperature	25	201	40	25	30	40	40	33	33	33	25	5	20	38	5	20	25	25	38	38	38	38	10	10	-25	-24
	Pressure	1.01325	4	4	1.01325	1.01325	4	4	4	4	4	1.01325	1.01325	1.01325	1.01325	1.01325	1.01325	1.01325	4	1	4	4	4	1.01325	1.01325	1.01325	1.01325
	Product Extraction and Purification
		SH-1	L-7	L-8	WL-1	L-9	WL-2	WL-3	AIR-1	AIR-2	STM-1	STM-2	AIR-3	L-10	L-11	STM-3	STM-4	L-12	BM-1	L-13	L-14	BM-2	L-15	L-16	CW-11	CW-12	L-17	PHB-1	L-18	PHB-2	L-19	L-20	AIR-4	AIR-5	STM-5	STM-6	AIR-6	PHB-3	L-21	L-22	L-23	WL-4	W-1	W-2	CW-13	CW-14	W-3	W-4	WL-4
	PHB	0	12377	12377	0	12253	124	124	0	0	0	0	0	12253	12253	0	0	9087	3166	0	3095	70	12183	12183	0	0	12183	12183	0	12183	0	0	0	0	0	0	0	12183	0	0	0	0	0	0	0	0	0	0	0
	Biomass	0	12377	12377	0	12253	124	124	0	0	0	0	0	12253	12253	0	0	123	12130	0	0	12130	123	123	0	0	123	123	0	49	74	74	0	0	0	0	0	49	74	74	0	74	0	0	0	0	0	0	0
	Water	0	2472020	328867	2143150	45965	282901	2426051	0	0	0	0	0	2724	14215	0	0	10543	3672	2862	3591	1016	14132	14132	0	0	124410	59177	65234	6269	82013	82013	0	0	0	0	0	64	150109	150109	135098	15011	118710	118710	0	0	118710	106839	11871
	Potassium Carbonate	0	0	0	0	0	0	0	0	0	0	0	0	0	0	0	0	0	0	0	0	0	0	0	0	0	0	0	0	0	0	0	0	0	0	0	0	0	0	0	0	0	0	0	0	0	0	0	0
	Methanol	0	0	0	0	0	0	0	0	0	0	0	0	0	0	0	0	0	0	0	0	0	0	0	0	0	0	0	0	0	0	0	0	0	0	0	0	0	0	0	0	0	0	0	0	0	0	0	0
	Sodium Formate (Buffer)	0	0	0	0	0	0	0	0	0	0	0	0	0	0	0	0	0	0	0	0	0	0	0	0	0	0	0	0	0	0	0	0	0	0	0	0	0	0	0	0	0	0	0	0	0	0	0	0
	Sodium Formate	0	0	0	0	0	0	0	0	0	0	0	0	0	0	0	0	0	0	0	0	0	0	0	0	0	0	0	0	0	0	0	0	0	0	0	0	0	0	0	0	0	0	0	0	0	0	0	0
	Acetone	0	0	0	0	0	0	0	0	0	0	0	0	0	220553	0	0	163575	56978	934	55713	331	219287	219287	0	0	219287	104306	114982	1885	190641	190641	0	0	0	0	0	0	306557	306557	306557	0	0	0	0	0	0	0
	Sodium Hydroxide	165	0	0	0	0	0	0	0	0	0	0	0	0	0	0	0	0	0	0	0	0	0	0	0	0	0	0	0	0	0	0	0	0	0	0	0	0	0	0	0	0	0	0	0	0	0	0	0
	Sulfuric Acid	0	0	0	0	0	0	0	0	0	0	0	0	0	0	0	0	0	0	0	0	0	0	0	0	0	0	0	0	0	0	0	0	0	0	0	0	0	0	0	0	0	0	0	0	0	0	0	0
	Ammonia	0	0	0	0	0	0	0	0	0	0	0	0	0	0	0	0	0	0	0	0	0	0	0	0	0	0	0	0	0	0	0	0	0	0	0	0	0	0	0	0	0	0	0	0	0	0	0	0
	Sodium Sulfate	0	293	39	254	5	33	287	0	0	0	0	0	5	5	0	0	4	1	0	1	0	5	5	0	0	5	3	3	0	2	2	0	0	0	0	0	0	5	5	5	0	5	5	0	0	5	0	5
	Carbon Dioxide	0	0	0	0	0	0	0	0	0	0	0	0	0	0	0	0	0	0	0	0	0	0	0	0	0	0	0	0	0	0	0	0	0	0	0	0	0	0	0	0	0	0	0	0	0	0	0	0
	Oxygen	0	0	0	0	0	0	0	376764	376764	0	0	376754	0	0	0	0	0	0	0	0	0	0	0	0	0	0	0	0	0	0	0	56416	56416	0	0	56416	0	0	0	0	0	0	0	0	0	0	0	0
	Nitrogen	0	0	0	0	0	0	0	1241460	1241460	0	0	1241460	0	0	0	0	0	0	0	0	0	0	0	0	0	0	0	0	0	0	0	185892	185892	0	0	185892	0	0	0	0	0	0	0	0	0	0	0	0
	Water Vapor	0	0	0	0	0	0	0	16352	16352	0	0	59593	0	0	0	0	0	0	0	0	0	0	0	0	0	0	0	0	0	0	0	2449	2449	0	0	8654	0	0	0	0	0	0	0	0	0	0	0	0
	Hydrogen	0	0	0	0	0	0	0	0	0	0	0	0	0	0	0	0	0	0	0	0	0	0	0	0	0	0	0	0	0	0	0	0	0	0	0	0	0	0	0	0	0	0	0	0	0	0	0	0
	Cooling Water	0	0	0	0	0	0	0	0	0	0	0	0	0	0	0	0	0	0	0	0	0	0	0	1150140	1150140	0	0	0	0	0	0	0	0	0	0	0	0	0	0	0	0	0	0	1417060	1417060	0	0	0
	Refrigerant	0	0	0	0	0	0	0	0	0	0	0	0	0	0	0	0	0	0	0	0	0	0	0	0	0	0	0	0	0	0	0	0	0	0	0	0	0	0	0	0	0	0	0	0	0	0	0	0
	Steam	0	0	0	0	0	0	0	0	0	57331	57331	0	0	0	9776	9776	0	0	0	0	0	0	0	0	0	0	0	0	0	0	0	0	0	8585	8585	0	0	0	0	0	0	0	0	0	0	0	0	0
	Total	165	2497067	353660	2143404	70476	283182	2426586	1634576	1634576	57331	57331	1677807	27235	259279	9776	9776	183332	75947	3796	62400	13547	245730	245730	1150140	1150140	356008	175792	180219	20386	272730	272730	244757	244757	8585	8585	250962	12296	456745	456745	441660	15085	118715	118715	1417060	1417060	118715	106839	11876
	Temperature	25	38	38	38	38	38	38	25	100	125	124	38	38	90	125	124	90	90	90	90	90	90	51	25	30	42	42	42	43	43	45	25	100	125	124	37	37	45	46	46	46	100	40	25	30	40	40	40
	Pressure	1.01325	1.01325	1.01325	1.01325	1.01325	1.01325	1.01325	1.01325	1.01325	2.3	2.3	1.01325	1.01325	3	2.3	2.3	3	3	1.01325	3	1.01325	3	3	1.01325	1.01325	1.01325	1.01325	1.01325	1.01325	0.5	1.01325	1.01325	1.01325	2.3	2.3	1.01325	1.01325	1.01325	2.5	1.01325	1.01325	1.01325	1.01325	1.01325	1.01325	3	1.01325	1.01325
[truncated: 10 more columns]

## Sheet: Scenarios Data
	Process Scenarios Lookup Table
	The data presented here is a lookup table with data from the ASPEN Plus model and key operating parameters that cannot be calculated directly. Here, initial parameters are specified as well. For the "User Specified" scenario, data can be input on the Summary Table tab and additional variables are calculated based off a scaling from the "Future Technology, Medium Carbon Scenario."
	Full Process Variables
	1	2	3	4	5	6	7	8	9	10	11	12	13	14	15	16	17	18	19	20	21	22	23	24	25	26	27	28	29	30	31	32	33	34	35	36	37	38	39	40	41	42	43	44
	Variable Units:	Electrocatalysis Methanol Carbon Conversion Efficiency (%)	Electrocatalysis Formate Carbon Conversion Efficiency (%)	Electrocatalysis Methanol Faradaic Efficiency (%)	Electrocatalysis Formate Faradaic Efficiency (%)	Electrocatalysis Current Density (A/cm^2)	Bioreactor Methanol to Biomass Yield (g/g)	Bioreactor Formate to Biomass Yield (g/g)	Bioreactor Methanol to PHB Yield (g/g)	Bioreactor Formate to PHB Yield (g/g)	Methanol Stoichiometry	Formate Stoichiometry	Pressure Swing Absorption Capacity (kmol/h)	Pressure Swing Absorption CO2 (kg/h)	Electrocatalysis Distillation Capacity (m^3/h)	Electrocatalysis Distillation Cost ($ USD)	Electrocatalysis Distillation Steam (kg/h)	Electrocatalysis Distillation Cooling Water (kg/h)	Bioreactor Inlet Pump (m^3/h)	Bioreactor Inlet Pump ($ USD)	Bioreactor Inlet Pump Electricity (kW)	Bioreactor Air Compressor (kg/h)	Bioreactor Air Compressor ($ USD)	Bioreactor Air Compressor Electricity (kW)	Bioreactor Air Cooler (kg/h)	Bioreactor Air Cooler ($ USD)	Bioreactor Air Cooler Cooling Water (kg/h)	Bioreactor Off-Gas Condenser (kg/h)	Bioreactor Off-Gas Condenser ($ USD)	Bioreactor Off-Gas Condenser Refrigerant (MJ/h)	Neutralization Vessel Capacity (m^3)	Biomass Gravity Belt Thickener Capacity (m^3/h)	Makeup Carbon Dioxide (kg/h)	Carbon Dioxide Fraction to PSA (mol/mol))	Carbon Dioxide Losses at PSA (kg/h)	Methanol Recirculating (kg/h)	Makeup Process Water (kg/h)	Bioreactor Methanol Concentration	Bioreactor Formate Concentration	Electrocatalysis Bottoms Cooler Capacity (m^3/h)	Electrocatalysis Bottoms Cooler Cost ($ USD)	Electrocatalysis Bottoms Cooler Cooling Water (kg/h)	Formate Catalyst Limetime (h)	Methanol Catalyst Limetime (h)
	Current Technology, Biocatalysis-Favouring	0.198	0.901	0.176	0.867	0.2	0.33	0.084	0.21	0.027	12	0	21495.1	621942	182367	9.60637e+07	2.88775e+07	1.17665e+08	2051.11	97200	212.659	126314	1.5688e+07	6362.18	126314	116111	1.00772e+06	104427	40993.7	4137.9	1957.97	1957.97	109157	0.657445	62194.2	1.37127e+06	1.34026e+06	0.049955	0	181503	2.08916e+07	1.23407e+09	100	50
	Current Technology, Balanced	0.198	0.901	0.176	0.867	0.2	0.33	0.084	0.21	0.027	4	20	17640	599620	83992.1	4.91655e+07	6.90418e+06	7.27927e+07	8818.77	629000	914.564	99867.8	1.22456e+07	5030.13	99867.8	92713.9	796736	334011	120753	11383.5	8476.71	8476.71	106925	0.772371	59962	631564	4.389e+06	0.00503643	0.0353789	83594.4	1.26215e+07	5.68374e+08	100	50
	Current Technology, Electrocatalysis-Favouring	0.198	0.901	0.176	0.867	0.2	0.33	0.084	0.21	0.027	2	26	16406.4	601472	45837.2	3.07254e+07	3.17018e+06	4.07612e+07	10213.4	795100	1059.2	91635.4	1.1174e+07	4615.46	91635.4	85430.7	731057	432829	149986	14195.1	9772.53	9772.53	107110	0.833011	60147.2	344665	5.57658e+06	0.00235291	0.0429793	45620.1	8.51429e+06	3.10179e+08	100	50
	Future Technology, Biocatalysis-Favouring	0.8	0.91	0.776	0.97	0.5	0.613	0.15	0.54	0.13	12	0	3792.48	27038.6	20184.3	14170800	2273200	92058400	919.56	37000	95.3595	32340.7	3.50669e+06	1628.92	32340.7	33292.3	27419.4	17090.9	12641.1	699.811	862.17	862.17	49662	0.161998	2703.86	124162	950830	0.0497937	0	19880.4	5016950	135272000	200	200
	Future Technology, Balanced	0.8	0.91	0.776	0.97	0.5	0.613	0.15	0.54	0.13	4	20	3598.21	100699	7461	6488800	796407	29366900	2615.82	140700	271.278	7877.73	1.15149e+06	396.783	7877.73	14660.9	62847.7	85577.2	36018.2	2146.2	2509.51	2509.51	57060.9	0.635898	10069.9	56101.7	2.51742e+06	0.0060603	0.0425715	7425.67	1725650	50488500	200	200
	Future Technology, Electrocatalysis-Favouring	0.8	0.91	0.776	0.97	0.5	0.613	0.15	0.54	0.13	2	26	3592.4	122395	3726.84	4633100	537132	29415800	3292.61	177700	341.466	2324.96	706751	125.992	2324.96	6632.39	19956.2	107410	41751	2397.56	3158.49	3158.49	59202	0.774154	12239.5	9731.73	3148114	0.00239045	0.0436627	3554.84	845405	23736400	200	200
	User Specified	0.8	0.91	0.776	0.97	0.5	0.613	0.15	0.54	0.13	4	20	3598.07	100695	7461.03	6.48882e+06	816900	2.9367e+07	2615.82	140700	271.278	7877.73	1.15149e+06	396.783	7877.73	14660.9	62847.7	85577.2	36018.2	2146.2	2546.44	2546.44	57032.7	0.635898	10069.5	56101.9	2.51741e+06	0.00612089	0.043	7425.7	1.72565e+06	5.04887e+07	200	200
	Electrocatalysis Subprocess Variables
	1	2	3	4	5	6	7	8	9	10	11	12	13	14	15	16	17	18	19	20
	Variable Units:	Pressure Swing Adsoprtion Capacity (kmol/h)	Pressure Swing Adsorption CO2 (kg/h)	Electrocatalysis Distillation Capacity (m^3/h)	Electrocatalysis Distillation Cost ($ USD)	Electrocatalysis Distillation Steam (kg/h)	Electrocatalysis Distillation Cooling Water (kg/h)	Makeup Carbon Dioxide (kg/h)	Carbon Dioxide Fraction to PSA (mol/mol)	Carbon Dioxide Losses at PSA (kg/h)	Methanol Recirculating (kg/h)	Makeup Process Water (kg/h)	Electrocatalysis Bottoms Cooler Capacity (m^3/h)	Electrocatalysis Bottoms Cooler Cost ($ USD)	Electrocatalysis Bottoms Cooler Cooling Water (kg/h)	Knockout Drum Capacity (m^3/h)	Knockout Drum Cost ($ USD)	Knockout Drum Steam (kg/h)	Steam Compressor Capacity (kg/h)	Steam Compressor Electricity (kW)
	Current Technology, Biocatalysis-Favouring	18960.7	536462	182399	1.35412e+08	3.6775e+07	7.45763e+08	186089	0.642886	53646.2	204154	248300	187577	2.09305e+07	1.29765e+09	0	0	0	0	0
	Current Technology, Balanced	9922.8	280589	84006.9	5.67505e+07	8.79236e+06	2.25292e+08	394053	0.642518	28058.9	123643	3.21424e+06	86391.8	1.2645e+07	5.97654e+08	3150.13	2.1034e+06	3.70778e+06	3.14003e+06	168951
	Current Technology, Electrocatalysis-Favouring	6454.38	182388	45845.2	3.77077e+07	4.03716e+06	1.84672e+08	484286	0.642083	18238.8	45363.8	4.29589e+06	47146.7	8.53013e+06	3.26159e+08	4299.85	2.89807e+06	5.06103e+06	4.28607e+06	230615
	Future Technology, Biocatalysis-Favouring	3362.74	14799.4	20173.8	21666500	2748120	135923000	60677.4	0.1	1479.94	114883	97000	20746.5	5002950	143518000	0	0	0	0	0
	Future Technology, Balanced	1643.84	16303	7462.31	10774900	1014210	50008500	133017	0.225349	1630.3	42737.4	2224650	7674.16	2556530	53089500	2323.72	1368100	2578550	2183520	117486
	Future Technology, Electrocatalysis-Favouring	1136.88	16740.9	3714.91	5832100	507917	25245100	154290	0.33459	1674.09	20963.9	2850900	3820.38	902447	26426800	3007.68	1897100	3337500	2826200	152066
	User Specified	1643.49	16299.6	7462.34	1.07749e+07	1.04031e+06	50008500	132989	0.225349	1629.96	42737.6	2.51741e+06	7674.19	2.55654e+06	5.30897e+07	2629.52	1.49177e+06	2.91788e+06	2.47087e+06	132947
	Bioconversion Subprocess Variables
	1	2	3
	Variable Units:	Water to Bioreactor (kg/h)	Water Recycled to Bioreactor (kg/h)
	Current Technology, Biocatalysis-Favouring	1833790	1833790
	Current Technology, Balanced	8302030	8302030
	Current Technology, Electrocatalysis-Favouring	9606430	9606430
	Future Technology, Biocatalysis-Favouring	822485	810353
	Future Technology, Balanced	2445630	2426051
	Future Technology, Electrocatalysis-Favouring	3093070	3071222
	User Specified	2.44563e+06	2.42605e+06

## Sheet: Market Variable Data
	Market Variable Data
	The value of market variables under different scenarios are provided here. Costs of steam and electricity utilities are provided as reference. Information on global carbon pricing schemes where an effective cost can be calculated are provided as well.
	Utility Costs						Global Carbon Prices
	Definition	Value	Units	Notes			Jurisdiction	Carbon Tax or ETS?	Price as of Aug. 2020 ($ USD/tonne of CO2)
	Steam						User Specified	N/A	N/A
	Electricity	0.0217187	$/kg	$0.03/kWh			Alberta, Canada	ETS	31.8345
	Natural Gas (2019 USA Average Price)	0.0108687	$/kg	$3.91/1000 ft^3			Argentina (Most Liquid Fuels)	Carbon tax	5.54304
							British Columbia, Canada	Carbon tax	35.8138
	Electricity						Beijing, China	ETS	4.32328
	User Specified	N/A					California, USA	ETS	17.94
	Baseline	0.03	$/kWh				Canada	Carbon tax	31.8345
	OECD Average (2019)	0.102	$/kWh				Chile	Carbon tax	5
	USA Average (May 2020)	0.0648	$/kWh				Chongqing, China	ETS	3.71458
	PV (2020)	0.045	$/kWh				Colombia	Carbon tax	5
	Onshore Wind (2020)	0.045	$/kWh				Denmark	Carbon tax	28.1408
	PV - Record Price (May 2020)	0.0135	$/kWh				European Union	ETS	49.7795
	IRENA - Low Projection (2030)	0.02	$/kWh				Estonia	Carbon tax	2.3492
							Finland (Transport Fuels)	Carbon tax	72.8252
							Finland (Other Fossil Fuels)	Carbon tax	62.2538
							France	Carbon tax	52.3872
							Fujian, China	ETS	1.24631
	Hydrogen Costs						Germany	Carbon tax	29.365
							Guangdong, China	ETS	5.71568
	Definition	Value	Units				Hubei, China	ETS	4.41154
	Green Hydrogen	5250	$/tonne				Iceland	Carbon tax	34.8349
	Blue Hydrogen	2200	$/tonne				Ireland (Transport Fuels)	Carbon tax	39.3491
	Grey Hydrogen	2050	$/tonne				Japan	Carbon tax	2.60854
							Kazakhstan	ETS	1.17678
							Latvia	Carbon tax	14.0952
							Liechtenstein	Carbon tax	101.475
							Luxembourg (Diesel Fuel)	Carbon tax	40.1243
							Luxembourg (Other Fossil Fuels)	Carbon tax	23.492
							Manitoba, Canada	Carbon tax	19.8965
							Massachusetts, USA	ETS	6.5
							Mexico (Upper Bound)	Carbon tax	3.17955
							Mexico (Average)	Carbon tax	1.77226
							Mexico (Lower Bound)	Carbon tax	0.364971
							Montenegro	ETS	28.1904
							Netherlands	Carbon tax	35.238
							New Brunswick, Canada	Carbon tax	31.8345
							New Zealand	ETS	25.7599
							Newfoundland and Labrador, Canada	Carbon tax	23.8758
							Northwest Territories, Canada	Carbon Tax	23.8758
							Norway (Upper Bound)	Carbon tax	69.3263
							Norway (Average)	Carbon tax	36.5987
							Norway (Lower Bound)	Carbon Tax	3.87101
							Nova Scotia, Canada	ETS	19.6578
							Poland	Carbon tax	0.0786243
							Portugal	Carbon tax	28.1904
							Prince Edward Island, Canada	Carbon tax	23.8758
							Quebec, Canada	ETS	17.94
							RGGI, USA	ETS	8.69
							Saitama, Japan	ETS	5.41565
							Saskatchewan, Canada	ETS	31.8345
							Shanghai, China	ETS	6.31524
							Shenzhen, China	ETS	1.12
							Singapore	Carbon tax	3.71361
							Slovenia	Carbon tax	20.3206
							South Africa	Carbon tax	9.15094
							South Korea	ETS	15.8926
							Spain	Carbon tax	17.619
							Sweden	Carbon tax	137.243
							Switzerland (ETS)	ETS	46.1031
							Switzerland (Carbon Tax)	Carbon tax	101.475
							Tamaulipas, Mexico	Carbon tax	12.7202
							Tianjin, China	ETS	3.80436
							Tokyo, Japan	ETS	4.87409
							United Kingdom	Carbon tax	24.795
							Ukraine	Carbon tax	0.35942
							Zacateca, Mexico	Carbon tax	12.2309
	Sources
	Variable	Source
	Natural Gas Price	EIA, "Natural Gas Monthly," U.S. Energy Information Administration, 2020.
	Steam Price Calculation	TLV, "Calculator: Steam Unit Cost," TLV, Japan. Accessed August 12 2020: https://www.tlv.com/global/TI/calculator/steam-unit-cost.html?advanced=on
	OECD Average Electricity Price	IEA, "Electricity Information." International Energy Agency, France, 2020.
	USA Average Electricity Price	EIA, "Electric Power Monthly," U.S. Energy Information Administration, 2020. Accessed August 12 2020: https://www.eia.gov/electricity/monthly/epm_table_grapher.php?t=epmt_5_6_a
	PV Electricity Price	IRENA, "How Falling Costs Make Renewable a Cost-Effective Investment," International Renewable Energy Agency, Abu Dhabi, 2020.
	Onshore Wind Electricity Price	IRENA, "How Falling Costs Make Renewable a Cost-Effective Investment," International Renewable Energy Agency, Abu Dhabi, 2020.
	Record PV Price	Crider, J. "Abu Dhabi to Have Cheapest Solar Power Ever - 1.35 Cents per Kilowatt-hour," CleanTechnica, 2020. Accessed August 12, 2020: https://cleantechnica.com/2020/05/06/abu-dhabi-will-have-the-cheapest-solar-farm-ever-built/
	IRENA Electricity Projection	IRENA, "Future of Solar Photovoltaic: Deployment, Investment, Technology, Grid Integration, and Socio-economic Aspects," International Renewable Energy Agency, Abu Dhabi, 2019.
	Hydrogen Costs	IEA, "The Future of Hydrogen." International Energy Agency, France, 2019.
	Global Carbon Prices	The World Bank, "Carbon Pricing Dashboard," World Bank Group, USA. Accessed 11 June 2021: https://carbonpricingdashboard.worldbank.org

## Sheet: Constants & Conversions
	Constants & Conversions
	Conversions used in the calculations are provided below. In addition, the molecular weights of the species used in calculations are provided. Finally, universal constants and miscellaneous constants were included.
	Conversions					Molecular Weights				Universal Constants						Miscellaneous					Electricity Emissions Data
	Converted From	Converted To	Factor			Species	MW (g/mol)			Constant	Symbol	Value	Units			Definition	Value	Units			Source	Capacity	Units	Emissions Intensity	Units
	Gallon	Litre	3.78541			HCOO	45.017			Universal Gas Constant	R	8.314	J/mol.K			Refrigerant Coefficient of Performance	3	-			Other (Geothermal)	651.81	TWh	33.6	gCO2eq/kWh
	Litre	Cubic Metre	0.001			NaHCOO	68.007			Gravity	g	9.81	m/s^2			Heat of Vaporization for Water @ 100 C	2256.4	kJ/kg			Solar	724.09	TWh	29.2	gCO2eq/kWh
	/Second	/Operating Year	30240000			O2	31.999			Faraday Constant	F	96485	C/mol			Heat of Vaporization for Water @ 124 C	2188.7	kJ/kg			Wind	1429.62	TWh	9.4	gCO2eq/kWh
	/Minute	/Operating Year	504000			N2	28.0134									Steam-Water Temperature Difference	99.9	C			Hydropower	4222.21	TWh	11.6	gCO2eq/kWh
	/Hour	/Operating Year	8400			H2O	18.015									Specific Heat Capacity of Water @ 25 C	4179.6	J/kg.K
	/Day	/Operating Year	350			CH3OH	32.04									Energy Content of Natural Gas	1037	Btu/ft^3
	/Hour	/Day	24			CO2	44.01									Natural Gas to Steam Efficiency	0.857	-
	/Second	/Hour	3600			NH3	17.031									Emission Factor of Natural Gas	0.0548	kgCO2/ft^3
	/Second	/Minute	60			Biomass	92.27									Density Water @ 40 C	993	kg/m^3
	kW	kWh/Operating Year	8400			PHB	86.09									Density CH3OH @ 40 C	773.8	kg/m^3
	hp	kW	0.7457													Density Sodium Formate @ 20 C	1920	kg/m^3
	kWh	MJ	3.6
	cm^2	m^2	0.0001
	Arbitary Units	10^3 Shift	1000
	$	$M	1000000
	EURO	USD	1.11
	Water Mass @ 25C	Water Volume @ 25C	0.00100301
	kg	lb	2.20462
	Btu	MJ	0.001055
	Sources
	Variable	Source
	Electricity Emissions Capacity	Hannah Ritchie and Max Roser, "Renewable Energy." 2020. Published online at OurWorldInData.org. Retrieved from: 'https://ourworldindata.org/renewable-energy' [Online Resource]
	Electricity Emissions Intensity	NREL (2013), "Life Cycle Greenhouse Gas Emissions from Electricity Generation." NREL, 2013.
	Natural Gas Energy Content	EIA, "Units and Calculators Explained." EIA, 2020. https://www.eia.gov/energyexplained/units-and-calculators/
	Natural Gas to Steam Efficiency	US DOE, "Benchmark the Fuel Cost of Steam Generation." US DOE, 2014. https://www.energy.gov/sites/prod/files/ 2014/05/f16/steam15_benchmark.pdf
	Emission Factor of Natural Gas	EPA, "Greenhouse Gases Equivalencies Calculator - Calculations and References." United States Environmental Protection Agency, Accessed 2021. https://www.epa.gov/energy/greenhouse-gases-equivalencies-calculator-calculations-and-references
